## RESEARCH ARTICLE

# The influence of stochastic temperature fluctuations in shaping the physiological performance of the California mussel, *Mytilus californianus*

Sarah J. Nancollas and Anne E. Todgham\*

## ABSTRACT

Climate change is forecasted to increase temperature variability and stochasticity. Most of our understanding of thermal physiology of intertidal organisms has come from laboratory experiments that acclimate organisms to submerged conditions and steady-state increases in temperatures. For organisms experiencing the ebb and flow of tides with unpredictable low tide aerial temperatures, the reliability of reported tolerances and thus predicted responses to climate change requires incorporation of environmental complexity into empirical studies. Using the mussel *Mytilus californianus*, our study examined how stochasticity of the thermal regime influences physiological performance. Mussels were acclimated to either submerged conditions or a tidal cycle that included either predictable, unpredictable or no thermal stress during daytime low tide. Physiological performance was measured through anaerobic metabolism, energy stores and cellular stress mechanisms just before low tide, and cardiac responses during a thermal ramp. Both air exposure and stochasticity of temperature change were important in determining thermal performance. Glycogen content was highest in the mussels from the unpredictable treatment, but there was no difference in the expression of heat shock proteins between thermal treatments, suggesting that mussels prioritise energy reserves to deal with unpredictable low tide conditions. Mussels exposed to fluctuating thermal regimes had lower gill anaerobic metabolism, which could reflect increased metabolic capacity. Our results suggest that although thermal magnitude plays an important role in shaping physiological performance, other key elements of the intertidal environment complexity such as stochasticity, thermal variability and thermal history are also important considerations for determining how species will respond to climate warming.

**KEY WORDS:** Environmental predictability, Unpredictable, Climate change, Cardiac performance, Intertidal physiology, Bioenergetics

## INTRODUCTION

A central question of environmental biology is how organisms integrate environmental signals mechanistically via physiological systems and how this integration leads to variation in species performance (Doak and Morris, 2010; Helmuth et al., 2006; Somero, 2010). Owing to the fundamental role of temperature on biological patterns and processes, understanding the capacity of an

organism to tolerate climate-change-induced variations in temperature has been a central focus in ecophysiology (Burggren, 2019; Kroeker et al., 2016; Sheldon, 2019). Climate change is predicted to increase the annual mean global temperature, but will also increase the frequency and magnitude of short-term (weather) and long-term (climate) extreme events (Burggren, 2018, 2019; Stillman, 2019). A central prediction of recent climate change models is that there will be an increase in temperature variation and stochasticity, which will increase the probability of extreme warm temperatures (Angélil et al., 2017; Guo et al., 2018; IPCC, 2021; Stillman, 2019) and heat wave events (Angélil et al., 2017; IPCC, 2021). The majority of research to date investigating the link between climate change and organismal performance has focused on mean environmental conditions over time, yet temperature variability and extreme events can substantially impact organismal physiology and, ultimately, survival (Baldwin et al., 2019; Buckley and Kingsolver, 2012; Drake et al., 2017). This is particularly true with regard to studies based on the rocky intertidal ecosystem, where experiments have typically focused on steady-state or predictable increases in temperature when organisms are submerged in water, rather than stochastic variations in temperature during air exposure (low tide), which is more representative of the natural environment resulting from the ebb and flow of the tide.

The importance of environmental complexity in ecophysiological research has led to an increase in studies incorporating temperature change during a tidal cycle framework (Drake et al., 2017; Han et al., 2013; Jimenez et al., 2016; Mangan et al., 2019; Marshall and McQuaid, 1992; Marshall et al., 2011; McMahon et al., 1991; Paganini et al., 2014; Widdows and Shick, 1985; Yin et al., 2017). In particular, recent work has started to explore different aspects of thermal complexity, such as the medium in which thermal stress occurs (air or water). The results of such studies have shown that intertidal organisms have higher upper thermal tolerance limits when subjected to thermal stress in air in comparison to in water (Bjelde and Todgham, 2013; Bjelde et al., 2015; Drake et al., 2017) and that periodic air exposure can result in physiological adjustments that increase thermal tolerance (Drake et al., 2017; Roberts et al., 1997; Stillman and Somero, 2000). Moreover, changes in water level is perhaps the most predictable environmental fluctuation in the intertidal zone, and therefore it is thought that air exposure may act as the cue that primes intertidal organisms for anticipated periods of stress during low tide (Bjelde and Todgham, 2013; Drake et al., 2017). Similarly, it is becoming more apparent that thermal fluctuation, rather than constant temperatures, provides crucial complexity that is important in structuring stress tolerance. Exposure to predictable fluctuating thermal environments can increase thermal tolerance (da Silva et al., 2019; Drake et al., 2017; Feldmeth et al., 1974; Kern et al., 2015; Marshall et al., 2021; Oliver and Palumbi, 2011; Otto and Rice,

Department of Animal Science, University of California, Davis, Davis, CA 95616, USA.

\*Author for correspondence (todgham@ucdavis.edu)

© A.E.T., 0000-0003-1439-6985

Received 28 October 2021; Accepted 20 June 2022

1974; Schaefer and Ryan, 2006; Threader and Houston, 1983; Vafeiadou et al., 2018), and intertidal species exposed to thermal fluctuations can be more tolerant to additional stressors than those that are exposed to constant temperatures (Collins et al., 2020; Drake et al., 2017; Giomi et al., 2016; Podrabsky and Somero, 2004; Stillman and Somero, 1996; Todgham et al., 2006; Tomanek and Sanford, 2003). Although incorporating predictable temperature fluctuation into experimental design is more representative of what occurs naturally in the intertidal, temperature variation typically occurs stochastically (Burggren, 2019; Dillon et al., 2016), and thus predictable cycles often do not accurately capture the thermal environment *in situ*, and can risk ‘overpredicting’ the degree of responses if the temperatures used are unrealistic. Therefore, studies with predictable temperature change may not capture the full repertoire of an organism’s natural physiological responses associated with unpredictable temperature fluctuations and extreme weather events produced by climate change (Burggren, 2019). Our understanding of how thermal stochasticity influences the physiological performance of intertidal organisms is extremely limited.

Extensive investigation of the mechanisms underlying thermal tolerance have revealed the importance of cellular defence mechanisms and energy metabolism in enhancing performance and maintaining homeostasis during daytime low tide (Sokolova et al., 2012). Tolerance to thermal stress is enabled by employing cellular stress mechanisms such as heat shock proteins (Hsps), and the magnitude and induction temperature of the heat shock response has advanced our understanding of how the environmental signal is integrated to modulate thermal tolerance in intertidal organisms (Buckley et al., 2001; Dong et al., 2008; Han et al., 2013; Hofmann and Somero, 1995; Madeira et al., 2015; Rhee et al., 2009; Roberts et al., 1997; Sagarin and Somero, 2006; Tomanek and Somero, 1999; Tomanek and Sanford, 2003; Wang et al., 2020). Previous studies in limpets, gastropods and corals that have shown evidence of ‘preparative defence’ (Dong et al., 2008) or cellular ‘frontloading’ (Barshis et al., 2013), where species prepare for a period of anticipated stress by upregulating Hsp70 or Hsc70 (Dong et al., 2008) in advance. Stress response mechanisms such as Hsps are energetically expensive, and require sufficient energy available to mount a comprehensive defence (Ivanina et al., 2008; Sokolova et al., 2012). For sessile organisms such as mussels, air exposure during low tide can result in valve closure to reduce desiccation during low tide (e.g. Bayne et al., 1976). Valve closure can often lead to hypoxic conditions, resulting in a greater reliance on anaerobic metabolism (Demers and Guderley, 1994), which can be exacerbated by concurrent heat stress (Dowd and Somero, 2013). The comparable inefficiency of anaerobic pathways in producing energy in comparison to aerobic pathways results in mussels relying on strategies such as metabolic depression (Anestis et al., 2010), increased enzyme activity in anaerobic pathways (Collins et al., 2020) and sufficient energy stores to ensure enough energy is available to mount a sufficient response to low tide periods (Sokolova et al., 2012; Widdows and Shick, 1985). Although we have a good, broad understanding of the importance of energy metabolism and cellular defence mechanisms in tolerating thermal stress, we currently know very little about how the specific elements of the thermal signal influence these mechanisms to shape thermal performance of intertidal organisms.

The primary objective of this study was to investigate how varying levels of thermal complexity (air exposure, magnitude of fluctuation, and predictability) modulated preparatory mechanisms for energy metabolism and cellular stress defence mechanisms and

how this shaped performance during thermal stress in the California mussel, *Mytilus californianus*. The California mussel is predominantly distributed along the coast of California. In Northern California, winter/spring months can experience unpredictable warm days for mussels owing to sun exposure creating high internal temperatures in comparison to the surrounding air temperature. We examined how acclimation to either submerged conditions or a tidal cycle that included either unpredictable, predictable, or no thermal stress during daytime low tide influenced growth rates, malate dehydrogenase (MDH) activity, glycogen content, succinate content and Hsp/Hsc70 levels just before low tide (i.e. just before being air exposed in tidal treatments), and cardiac performance during an acute thermal ramp during low tide. Performance was also compared with wild (termed ‘field’ here) mussels to better understand how complexity modulated in the lab compared with mussels from the field to identify key underlying drivers influencing thermal performance. We hypothesised that mussels acclimated to an unpredictable thermal regime would need to be prepared for unexpected, but potentially high levels of thermal stress and thus would rely on greater energy expenditure and higher basal levels of cellular defence mechanisms to tolerate stressful low tide periods. We predicted that mussels acclimated to the unpredictable regime would exhibit elevated glycogen, succinate and Hsp/Hsc70 levels and higher MDH activity and lower growth rates compared with mussels acclimated to predictable or no thermal stress. The preparatory strategy utilized by mussels in the unpredictable regime was predicted to lead to elevated upper thermal tolerance during an acute stress event during daytime low tide. With the predicted increases in thermal unpredictability forecasted by climate change models, understanding how thermal predictability shapes performance during acute stress and assessing the underlying mechanisms controlling energy dynamics and stress tolerance will be paramount for predicting how climate change will affect intertidal organisms.

## MATERIALS AND METHODS

### Mussel collection

*Mytilus californianus* (Conrad 1837) were collected during low tide from the mid-upper intertidal zone at Shell Beach, CA, USA (38°25′ 17″N, 123°06′47″W), in March 2019. Mussels (length range 47.5–52.5 mm) were then transported to the University of California, Davis, Bodega Marine Laboratory in Bodega Bay, CA, USA, cleaned of epibionts and placed in a flow-through tank at 13°C, 33.5‰ salinity and 100% air saturation. Collection and transport lasted no longer than 2 h.

### Acclimation conditions

Experimental tanks and treatment design were modelled on the methods outlined in Drake et al. (2017), with some modifications. Tanks were built to simulate natural intertidal conditions by replicating circatidal changes in water height and temperature. Tanks were flow-through and continuously flushed with fresh seawater during high and low tides. Temperature and water height were manipulated using Arduino microcontrollers (Arduino YUN, Adafruit, New York, NY, USA; Miller and Long, 2015; Drake et al., 2017). For mussels, the dominant driver controlling body temperature is solar radiation (Helmuth, 1998; Helmuth et al., 2016); therefore, heat lamps with 150 W ceramic bulbs were used to modulate mussel body temperature during daytime low tide periods. The Arduino microcontroller manipulated mussel body temperature through a feedback system between a temperature sensor encased in a mussel shell with silicone (similar design as ‘Robomussels’;

Fitzhenry et al., 2004) and the heat lamp. Temperature of the heat lamp (and mussel body temperature) was regulated and ramped at specific rates depending on the acclimation treatment. As orientation to the sun can also have a large impact of the warming rate and ultimate body temperature (Harley, 2008; Miller and Dowd, 2017), mussels were individually housed in small mesh baskets to allow similar orientation to the heat lamp and promote a uniform heating rate among individuals in each tank. Mesh baskets were attached to a plastic grate platform (height  $\approx 14$  cm), which enabled mussels to either be immersed or emersed depending on changes in water height.

Mussels were weighed, measured, labelled and randomly divided between one of four different acclimation treatments (unpredictable, predictable, air, submerged) that incorporated varying levels of natural predictability, and were held under these conditions for 2 weeks. Temperature profiles for treatments were based on daytime low tide data from Robomussel temperature loggers (Maxim Integrated Products, Dallas, TX, USA) embedded on the rock next to *M. californianus* in Bodega Marine Reserve that continuously monitored temperature every 10 min from 11 January 2019 to 1 March 2019. California experiences mixed semidiurnal tides where successive daytime low tides can often be progressively later in the morning, resulting in subsequent days experiencing potentially higher low tide temperatures during a period of warm weather; and unpredictable warm days can occur more frequently in this season owing to the difference in sun exposure and air temperature.

The unpredictable treatment was a circatidal regime (6 h emersed, 6 h immersed) with ambient seawater conditions ( $\sim 13^\circ\text{C}$ ) and varying aerial temperatures within the range of  $13\text{--}28^\circ\text{C}$  (Fig. 1) during daytime low tide. This temperature profile mirrored a 2-week period of natural cycles in environmental temperature within the logger data, which was equal to the average temperature of daytime low tide during the 7-week logger period ( $20^\circ\text{C}$ ) and included the maximum temperature recorded ( $28^\circ\text{C}$ ). The predictable treatment was a circatidal regime with ambient seawater conditions ( $\sim 13^\circ\text{C}$ ) with a consistent maximum aerial temperature of  $20^\circ\text{C}$  every

daytime low tide. The predictable treatment was designed to subject mussels to the same degree of heating throughout the 2 weeks as the unpredictable treatment, but in a predictable manner. To understand the role of periodic air exposure on physiological performance, the air treatment was a circatidal regime with ambient seawater conditions ( $\sim 13^\circ\text{C}$ ) and no heating during daytime low tide ( $13^\circ\text{C}$ ). The submerged treatment acted as a control and had no tidal regime, mussels were submerged in ambient seawater ( $\sim 13^\circ\text{C}$ ) and experienced no aerial exposure. For all treatments that experienced a tidal cycle (unpredictable, predictable, air), no heating occurred during night-time low tide (i.e. constant  $13^\circ\text{C}$  aerial exposure).

In order to understand which components of the acclimation treatments were key drivers for *in situ* performance, physiological responses of mussels from the four acclimation treatments were also compared with wild mussels (hereafter termed 'field treatment'). To avoid the effects of collection and handling stress on the performance of field mussels, mussels of the same size range were collected from the same sampling location (Shell Beach) during daytime low tide, cleaned of epibionts and placed in tanks under a circatidal regime that coincided with the tidal cycle of Shell Beach. Mussels were held under these conditions for 18 h before being sampled for the physiological parameters described below.

Each of the treatments had two replicate tanks (10 tanks in total) and were conducted simultaneously. During acclimation trials, temperature, salinity and dissolved oxygen were measured every day, and nitrate, nitrite and ammonia were checked twice a week to ensure acceptable conditions for mussels. Temperature, salinity and dissolved oxygen were measured using a YSI Model 85 (YSI Incorporated, Yellow Springs, OH, USA) and nitrate, nitrite and ammonia were checked using an API saltwater test kit (API, Chalfont, PA, USA). Mussels were fed live *Nannochloropsis* sp. every daytime high tide at an average density of  $150,000\text{ cells ml}^{-1}\text{ tank}^{-1}$ , which correlated to approximately  $7500\text{ cells ml}^{-1}\text{ mussel}^{-1}$ . Mortality was low in all tanks ( $\leq 5\%$ ) and if occurred, food was adjusted to maintain consistent per mussel density across tanks.

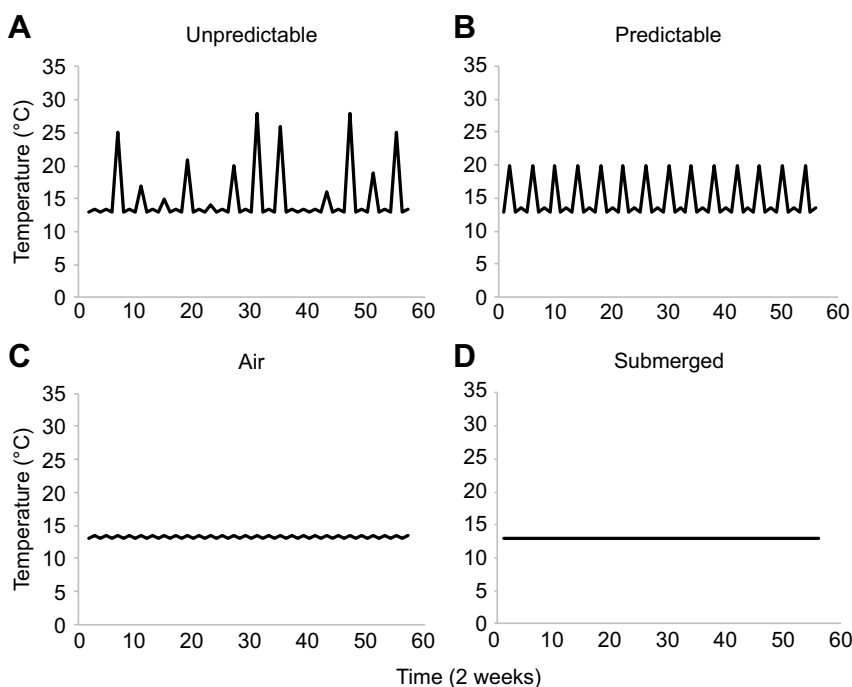

**Fig. 1. Temperature profiles for each acclimation treatment over the 2-week acclimation period.**

(A) Unpredictable treatment: circatidal regime and varying aerial temperatures during each daytime low tide. (B) Predictable treatment: circatidal regime with consistent, predictable warming to  $20^\circ\text{C}$  each daytime low tide. (C) Air treatment: circatidal regime with no warming during daytime low tide. (D) Submerged treatment: control where mussels were permanently submerged (no tidal regime, no air exposure).



### Heart rate

Difference in upper thermal tolerance limits were estimated by examining upper critical thermal limits of cardiac performance. Heart rate was monitored for each individual using a non-invasive technique introduced by Depledge et al. (1996) and modified by Burnett et al. (2013). A sensor consisting of an infrared emitter and phototransistor was permanently glued next to the mid-dorsal posterior hinge area that corresponds to the position of the heart. Similarly to Tagliarolo and McQuaid (2015), preliminary tests showed that the heart rate signals stabilised 10 to 15 min after handling. Therefore, mussels were left undisturbed for 15 min after attachment of the sensor to recover before the start of recording. The signal from the sensor was amplified using AMP-03 (Newshift LDA, Leiria, Portugal), digitised using a data acquisition system (PowerLab 16/35, ADInstruments, Colorado Springs, CO, USA) and recorded with the associated software (LabChart 8.0, ADInstruments). A temperature probe (Type T thermocouple) inserted into a Robomussel was also attached to the data acquisition system via a thermocouple meter (TC-2000, Sable Systems International, Las Vegas, NV, USA) to give a live temperature feed during the thermal ramp that was also recorded through the LabChart software. Fifteen mussels from each of the five treatments were exposed to ramped increases in temperature in air starting at 13°C (ambient ocean temperature) at rate of 6.5°C h<sup>-1</sup>. The heat ramp was timed to so that it would occur at the start of the scheduled daytime low tide period during acclimation. Temperature was ramped using the Arduino microcontroller–heat lamp system described previously.

### Cardiac performance analysis

Cardiac performance was analysed following methods previously described for limpets (Bjelde and Todgham, 2013; Drake et al., 2017). Several measures of performance were used to determine overall cardiac performance. Firstly, final break point temperature (BPT) was measured, which is defined as the highest temperature reached before a steep decline in heart rate and is considered to be the upper critical thermal limit of intertidal organisms (Stillman and Somero, 1996), including mussels (Tagliarolo and McQuaid, 2015). Final BPT was calculated as described elsewhere (Bjelde and Todgham, 2013; Drake et al., 2017). Briefly, individual mussel heart rate (beats min<sup>-1</sup>) was plotted against temperature and the intersection point (BPT) was determined by two best-fit regression lines for the ascending and descending portion of the heart rate. Secondly, flat line temperature (FLT) was determined by manually observing the temperature of the last heartbeat on LabChart recordings. The difference (FLT–BPT) was also calculated to determine the temperature range of suboptimal performance (Drake et al., 2017). Maximum heart rate for each individual mussel was determined as a measure of cardiac capacity and defined as the highest heart rate recorded during the heat ramp. Lastly, temperature sensitivity of heart rate was examined using thermal performance curves.

### Shell growth

Increases in shell length was used as a proxy for growth. Shell length (measurement of umbo to shell edge) of each individual was measured just before mussels were placed in the acclimation tanks and after the 2-week acclimation period. Mussels were labelled to ensure correct tracking of each individual, and measurements were made using a caliper (precision 0.1 mm). As mussels from the field treatment were only held overnight to recover from collection, changes in shell length were not measured for this treatment.

### Mussel tissue sampling

We predicted that mussels in the unpredictable treatment would have preparatory mechanisms in place to tolerate unpredictable, but potentially high levels of thermal stress. To test this prediction, tissue samples (gill and mantle) were dissected from mussels ( $n=9$ ) from each treatment immediately prior to cardiac performance trials (therefore immediately prior to daytime low tide). Physiological condition was measured through biochemical analyses by assessing cellular stress mechanisms using gill tissue (Hsp/Hsc70 protein), energy stores using mantle tissue (glycogen content) and anaerobic capacity using both gill and mantle tissue [malate dehydrogenase (MDH) activity and succinate content]. Mussels were removed from treatment tanks and gill and mantle tissue were dissected quickly (i.e. in less than 45 s). Tissue samples were immediately frozen on dry ice and stored at –80°C until analysis.

### Sample preparation for Hsp/Hsc70 and total protein

Frozen gill samples (~100 mg) were used for total protein and Hsp/Hsc70 quantification. Tissue preparation, subsequent sodium dodecyl sulphate-polyacrylamide gel electrophoresis (SDS-PAGE) and western blot analysis were completed according to the methods of Todgham et al. (2005) with some modifications. Samples were homogenized on ice in a 1:2 solution of homogenisation buffer [100 mmol l<sup>-1</sup> Tris-HCl, pH 7.5; 0.1% SDS (w/v), 0.5 mol l<sup>-1</sup> EDTA] containing a combination of protease inhibitors: 0.7 µg ml<sup>-1</sup> pepstatin A, 0.5 µg ml<sup>-1</sup> leupeptin, 1 µg ml<sup>-1</sup> aprotinin and 20 µg ml<sup>-1</sup> phenylmethylsulfonyl fluoride (Sigma-Aldrich, St Louis, MO, USA). Homogenates were then centrifuged at 13,000 *g* for 10 min. Supernatants were transferred to a new microcentrifuge tube with an equal volume of 2× Laemmli's sample buffer [0.5 mol l<sup>-1</sup> Tris-HCl, pH 6.8; 20% glycerol (v/v), 4% SDS (w/v), 10% β-mercaptoethanol (v/v), 0.25% Bromophenol Blue] for SDS-PAGE. Samples were then heated for 3 min at 100°C and stored at –20°C before electrophoresis. The remaining supernatant was transferred to a new tube and stored at –20°C until analysed for total protein concentration using the bicinchoninic method (Smith et al., 1985) (Thermo Fisher Scientific, Waltham, MA, USA).

### SDS-PAGE and western blot analysis for Hsp/Hsc70

Levels of Hsp/Hsc70 were measured using the discontinuous SDS-PAGE method of Laemmli (1970). Equal amounts of total protein (10 µg) were resolved with a 4% stacking and 10% resolving gel on a Mini-Protean II electrophoresis cell (Bio-Rad Laboratories, Hercules, CA, USA). One lane in each gel was loaded with a prestained molecular marker (PageRuler, Thermo Fisher Scientific) and a second lane was loaded with an internal standard to calibrate protein expression within and among gels. The internal standard was a gill tissue sample from the submerged group that had shown positive expression of Hsp/Hsc70. Proteins were separated by SDS-PAGE at 75 V for 15 min followed by 150 V for 1 h. After separation of proteins by SDS-PAGE, gels were trimmed at the 35 kDa protein band of the ladder lane and transferred onto nitrocellulose (Bio-Rad, 0.2 µm pore size) via semi-dry transfer apparatus (Bio-Rad Trans-Blot) at 15 V for 20 min with transfer buffer [48 mmol l<sup>-1</sup> Tris, 39 mmol l<sup>-1</sup> glycine, 0.0375% SDS (w/v), 20% methanol (v/v), pH 9.3]. Transfer membranes were then blocked in 2% bovine serum albumin (BSA) in Tween-20 Tris-buffered saline [TTBS; 20 mmol l<sup>-1</sup> Tris-HCl, 0.14 mol l<sup>-1</sup> NaCl, 0.1% Tween-20 (v/v)] for 1 h. Membranes were then rinsed once and soaked in TTBS for 5 min. Membranes were then soaked in primary antibody (Mouse IgG Hsp70; MA3-007; Thermo Fisher Scientific) at a 1:1000 dilution with 2% BSA in TTBS. Membranes

were then washed three times for 5 min each in TTBS and then soaked in horseradish peroxidase-conjugated goat antimouse IgG secondary antibody (1706516, Thermo Fisher Scientific) diluted 1:5000 in 2% BSA in TTBS for 1 h. Membranes were then washed three times in TTBS for 5 min each, followed by one wash in Tris-buffered saline to remove Tween-20. Membranes were then developed with chemiluminescent SuperSignal West Dura Extended Duration Substrate (Thermo Fisher Scientific) for 5 min. Imaging was performed immediately on wet membranes placed directly on the image screen of a ChemiDoc XRS imager (Bio-Rad) and analysis for determination of relative Hsp/Hsc70 protein quantity was quantified using ImageJ software (<https://imagej.nih.gov/ij/>). Hsp/Hsc70 protein levels are presented relative to the band intensity of the internal standard.

### Glycogen content

Glycogen content was measured as described by Bjelde and Todgham (2013), modified from Fangue et al. (2008). Tissue was ground into a fine powder using liquid nitrogen and an insulated mortar and pestle. Glycogen was extracted by adding 1 ml of ice-cold 8% HClO<sub>4</sub> to ~20 mg of powdered tissue, which was then homogenized on ice for ~20 s with a Pro200 Bio-Gen Series homogeniser (PROScientific, Oxford, CT, USA). A sample of homogenate (200 µl) was placed in a microcentrifuge tube and frozen at –80°C for later glycogen quantification. The remaining homogenate was centrifuged at 10,000 g for 10 min at 4°C and the supernatant was extracted and neutralised with 3 mol l<sup>–1</sup> K<sub>2</sub>CO<sub>3</sub>. The neutralised solution was centrifuged at 10,000 g for 10 min at 4°C and frozen at –80°C for later free glucose assays. Samples for glycogen determination were enzymatically digested following previous methods (Hassid and Abraham, 1957), and all samples were analysed for glucose following a method (Bergmeyer, 1983) modified for a microplate spectrophotometer (Synergy HT, Biotek, Winooski, VT, USA). Glycogen content was then corrected for starting free glucose.

### MDH activity

MDH is an important enzyme involved in several different functions within the citric acid cycle and plays a key role in the aerobic pathway of ATP generation in bivalves (Hochachka and Somero, 2002; Logan et al., 2012). MDH activity was measured in gill and mantle tissue as described by Logan et al. (2012) with some modifications. Tissues were homogenised in ice cold 50 mmol l<sup>–1</sup> potassium phosphate buffer (pH 6.8 at 20°C) at a ratio of 1:10 for ~20 s with a Pro200 Bio-Gen Series homogeniser (PROScientific). Tissue homogenates were then centrifuged at 17,500 g for 30 min at 4°C. The supernatant was transferred into fresh tubes and spun for an additional 5 min. Aliquots of the resulting supernatant were made, with 100 µl stored at –20°C for total protein analysis and the remaining supernatant stored at –80°C for MDH activity. The activity of MDH was determined by monitoring the conversion of NADH to NAD<sup>+</sup> spectrophotometrically (Synergy HT, Biotek) at 340 nm at 25°C. MDH was assayed in 200 mmol l<sup>–1</sup> imidazole buffer (pH 7.0 at 20°C), 200 µmol l<sup>–1</sup> oxaloacetate and 150 µmol l<sup>–1</sup> NADH in triplicate. Total protein was quantified as described previously and MDH activity is expressed per milligram protein.

### Succinate content

Succinate has been found to be the most significant end-product of anaerobiosis in mussels (Connor and Gracey, 2012; Tagliarolo and McQuaid, 2015). Tissue was weighed and deproteinised with ice-

cold 8% HClO<sub>4</sub> at a ratio of 1:4, and was then homogenised for 1 min using a Pro200 Bio-Gen Series homogeniser (PROScientific). The homogenate was then centrifuged at 13,000 g for 10 min at 4°C. The supernatant was extracted and neutralised with 1 mol l<sup>–1</sup> KOH and kept on ice for 20 min and then centrifuged again at 13,000 g for 10 min at 4°C. The extract was stored at –80°C before analysis. Succinic acid content was assayed using a commercial kit according to the manufacturer's instructions (Megazyme International, Ireland). The succinic acid assay procedure applies the method of succinyl-CoA synthetase, pyruvate kinase and lactate dehydrogenase, according to Beutler (1989).

### Statistical analysis

All data sets were analysed using R (<https://www.r-project.org/>) and assessed for homogeneity and normality using residual and q-q plots, and tested with Shapiro–Wilk and Levene's tests. BPT, FLT, MDH activity, glycogen and succinic acid content met assumptions and were analysed with a one-way ANOVA with treatment as the main effect. Differences between acclimation treatments were differentiated using a Tukey's HSD. Shell length data did not meet the normality assumption and were analysed with a non-parametric Kruskal–Wallis test, followed by a Dunn's multiple comparison test with Bonferroni adjustment to differentiate differences between acclimation groups. Hsp/Hsc70 data did not meet normality or homogeneity of variance assumptions owing to no detectable expression of Hsp70/Hsc70 in the predictable and unpredictable treatments (expressed as 0). As such, Hsp/Hsc70 data were analysed with a Tobit model with left censoring using a log normal distribution in the survival package (<https://CRAN.R-project.org/package=survival>) within R. Pairwise comparisons with multiple-comparison correction (Tukey method) were then used to differentiate any differences between acclimation groups using the emmeans package (<https://CRAN.R-project.org/package=emmeans>). To assess differences in thermal sensitivity of heart rates between acclimation treatments, a generalised additive mixed model (GAMM) was used based on Zuur et al. (2009) and Angilletta et al. (2013) incorporating modifications from Drake et al. (2017). To account for repeated measures, the identity of each mussel was included as a random factor. Analyses were performed with the mgcv (Wood, 2004) and nlme (<https://CRAN.R-project.org/package=nlme>) packages in R.

## RESULTS

### Cardiac performance during thermal ramp

Acclimation treatment affected upper critical temperature of heart function, measured at final BPT during ramping increases in temperature (one-way ANOVA,  $F_{4,53}=4.849$ ,  $P=0.002$ ; Fig. 2). Mussels in the submerged treatment had the lowest final BPT of 34.70±0.61°C, which was statistically similar to that of the air and predictable treatments, but lower than that of the unpredictable and field treatments. The highest final BPT was observed in mussels in the unpredictable treatment (40.47±1.08°C). There was no significant difference between air, predictable, unpredictable and field treatments.

Similarly, acclimation treatment had a significant effect on the thermal limits of heart function, measured as FLT (one-way ANOVA,  $F_{4,53}=4.059$ ,  $P=0.006$ ; Fig. 3). Mussels in the submerged treatment had the lowest FLT at 41.04±0.66°C, which was significantly lower than all other treatments. Mussels acclimated to the unpredictable treatment had the highest FLT of 46.91±0.99°C, but this was statistically similar to that of the air, predictable and field treatments.

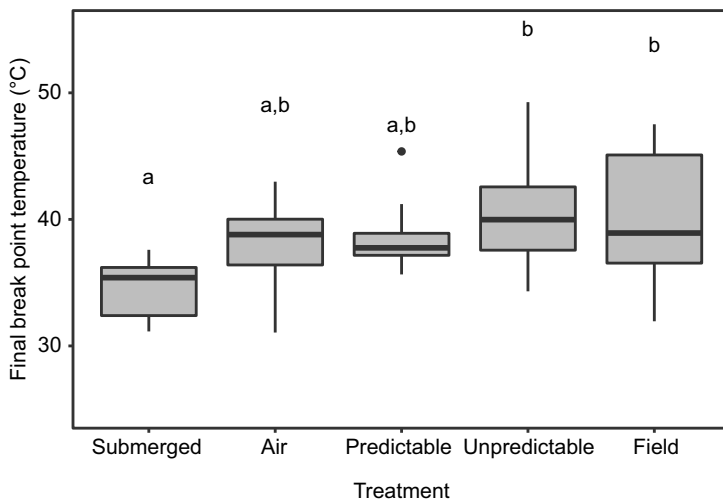

**Fig. 2.** Final break point temperature in heart rate for *Mytilus californianus* from submerged ( $n=11$ ), air ( $n=11$ ), predictable ( $n=11$ ), unpredictable ( $n=12$ ) and field ( $n=12$ ) acclimation treatments measured during a thermal ramp in air. The line on the boxplots represents the median, the box represents the inter-quartile range (IQR), the whiskers extend 1.5 times IQR. Points beyond the whiskers are outliers. Differences in letters represent significant differences between acclimation treatments (one-way ANOVA, Tukey's HSD,  $P<0.05$ ).

There was no difference in the temperature range between final BPT and FLT (FLT–BPT), suggesting similar suboptimal performance between treatments following final BPT (one-way ANOVA,  $F_{4,53}=0.586$ ,  $P=0.674$ ; Table 1). Maximum heart rate was different across acclimation treatments (one-way ANOVA,  $F_{4,53}=4.872$ ,  $P=0.002$ ; Table 1). Mussels from the unpredictable treatment had the highest heart rate ( $24.06\pm1.79$  beats  $\text{min}^{-1}$ ) and this was statistically similar to that of mussels from field and air treatments. Submerged mussels had the lowest maximum heart rate ( $16.87\pm1.51$  beats  $\text{min}^{-1}$ ), which was statistically similar to that of the predictable and air treatments.

The relationship between temperature and heart rate displayed slightly different patterns of temperature sensitivity of heart rate, depending on treatment. All acclimation treatments exhibited a non-linear response to warming, initially appearing relatively temperature insensitive and then exhibiting a steady increase in heart rate with increasing temperature until the ultimate decline in function (Fig. 4). In contrast, mussels from the field treatment appeared to display a more temperature-dependent increase in heart rate until the ultimate decline. GAMM analysis of the thermal performance curves shows that treatment had a significant effect on temperature sensitivity of mussel heart rates when compared with the submerged treatment (Table S1).

### Shell length

Acclimation treatment had a significant effect on the increase in shell length (Kruskal–Wallis,  $\chi^2=14.93$ , d.f.=3,  $P=0.002$ ; Fig. 5). Mussels acclimated to submerged conditions exhibited the greatest increase in shell length ( $0.46\pm0.06$  mm) and this was significantly higher than in the air, predictable and unpredictable treatments. Mussels from unpredictable treatments experienced the smallest increase in shell length ( $0.128\pm0.035$  mm), but this was statistically similar to the air and predictable treatments.

### Hsp/Hsc70 protein levels

When samples were taken just before the daytime low tide period, we found that acclimation treatment had a significant effect on Hsp/Hsc70 levels in gill tissue (Tobit model,  $\chi^2=44.41$ , d.f.=4,  $P\leq0.0001$ ; Fig. 6). Mussels from the submerged treatment displayed the highest relative protein levels of Hsc/Hsp70, but also the highest variation ( $118.4\pm35.5\%$  of internal standard), and levels in mussels from the submerged group were significantly elevated above the air, predictable and unpredictable treatments, but statistically similar to the field treatment. Mussels from the predictable and unpredictable treatments displayed no Hsp/Hsc70 protein expression, and thus had the lowest relative levels (0%).

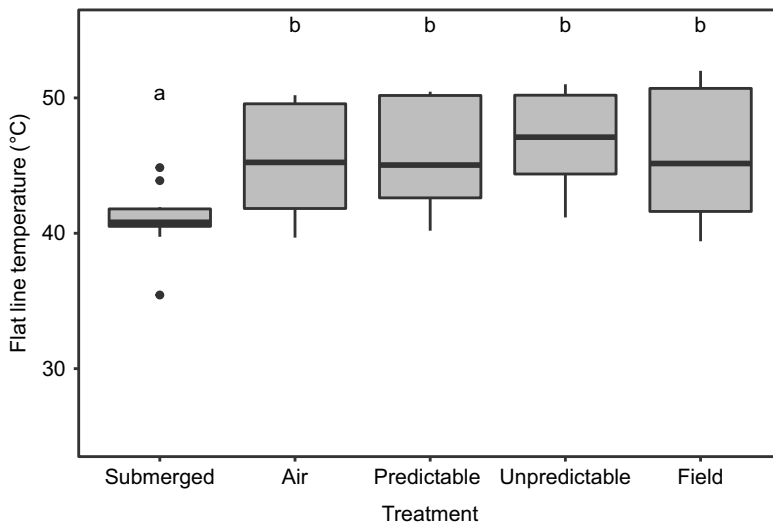

**Fig. 3.** Flat line temperature in heart rate for *M. californianus* from submerged ( $n=11$ ), air ( $n=11$ ), predictable ( $n=11$ ), unpredictable ( $n=12$ ) and field ( $n=12$ ) acclimation treatments measured during a thermal ramp in air. The line on the boxplots represents the median, the box represents the IQR, the whiskers extend 1.5 times IQR. Points beyond the whiskers are outliers. Differences in letters represent significant differences between acclimation treatments (one-way ANOVA, Tukey's HSD,  $P<0.05$ ).

**Table 1. Difference between flat line temperature (FLT) and final break point temperature (BPT), and maximum heart rate of mussels from the five acclimation treatments**

| Acclimation treatment | FLT–BPT (°C) | Maximum heart rate (beats min <sup>-1</sup> ) | N  |
|-----------------------|--------------|-----------------------------------------------|----|
| Submerged             | 6.65±0.96    | 16.87±1.51                                    | 11 |
| Air                   | 8.01±0.85    | 20.91±1.52                                    | 11 |
| Predictable           | 7.02±1.34    | 18.61±1.26                                    | 11 |
| Unpredictable         | 7.17±0.95    | 24.06±1.79                                    | 12 |
| Field                 | 6.01±0.83    | 21.64±1.79                                    | 12 |

Data are means±s.e.m.

### Glycogen content

When samples were taken just before the daytime low tide period, we found that acclimation treatment had a significant effect on mantle glycogen content (one-way ANOVA,  $F_{4,37}=6.324$ ,  $P=0.001$ ; Fig. 7). Mussels acclimated to the unpredictable treatment exhibited the highest glycogen content ( $48.86\pm7.7$   $\mu\text{mol glucosyl units g}^{-1}$  tissue), and this was significantly elevated above the submerged and predictable treatments, but similar to the air and field treatments. Mussels acclimated to the predictable regime had the lowest glycogen content ( $20.62\pm3.89$   $\mu\text{mol glucosyl units g}^{-1}$  tissue).

### MDH activity

When samples were taken just before the daytime low tide period, we found that acclimation treatment had a significant effect on gill malate dehydrogenase (MDH) activity (one-way ANOVA,  $F_{4,37}=5.495$ ,  $P=0.00142$ ; Fig. 8). Mussels acclimated to the submerged treatment exhibited the highest MDH activity ( $2.16\pm0.15$   $\mu\text{mol mg}^{-1}$  protein min<sup>-1</sup>), and this was significantly elevated above the unpredictable and field treatments, but similar to the air and predictable treatments. Mussels acclimated to the field regime had the lowest gill MDH activity ( $1.05\pm0.05$   $\mu\text{mol mg}^{-1}$  protein min<sup>-1</sup>). Comparatively, mantle MDH activity showed no difference across acclimation treatments

(one-way ANOVA,  $F_{4,37}=2.559$ ,  $P=0.0546$ ; Fig. 8). Mussels from the field treatment had the highest mantle MDH activity ( $2.07\pm0.31$   $\mu\text{mol mg}^{-1}$  protein min<sup>-1</sup>) whereas mussels acclimated to the air treatment had the lowest mantle MDH activity ( $1.25\pm0.07$   $\mu\text{mol mg}^{-1}$  protein min<sup>-1</sup>).

### Succinate content

When samples were taken just before the daytime low tide period, we found that acclimation treatment had a significant effect on gill succinate content (one-way ANOVA,  $F_{4,38}=9.105$ ,  $P=2.93\times10^{-5}$ ; Fig. 9). Mussels acclimated to the air treatment exhibited the highest gill succinate content ( $1.14\pm0.19$   $\mu\text{mol g}^{-1}$  tissue), and this was significantly elevated above the predictable, unpredictable and field treatments, but similar to the submerged treatment. Mussels from the field treatment had the lowest gill succinate content ( $0.25\pm0.1$   $\mu\text{mol g}^{-1}$  tissue). Comparatively, mantle succinate content showed no difference across acclimation treatment (one-way ANOVA,  $F_{4,37}=1.685$ ,  $P=0.174$ ; Fig. 9). Mussels from the predictable treatment had the highest mantle succinate content ( $1.83\pm0.39$   $\mu\text{mol g}^{-1}$  tissue), whereas mussels acclimated to the field treatment had the lowest mantle MDH activity ( $0.87\pm0.23$   $\mu\text{mol g}^{-1}$  tissue).

### DISCUSSION

Intertidal organisms must be able to integrate a large number of environmental signals in order to inhabit a widely fluctuating environment. A significant amount of attention has been focused on the thermal physiology of intertidal animals; however, there remains a large gap in understanding of how the complexities of the thermal signal (e.g. aerial exposure, magnitude, predictability) integrate to modulate stress tolerance. In our study we were interested to see how different levels of environmental complexity shaped the biochemical and physiological responses of *M. californianus*, particularly in relation to energy allocation, metabolic capacity and thermal tolerance. We predicted that mussels acclimated to an

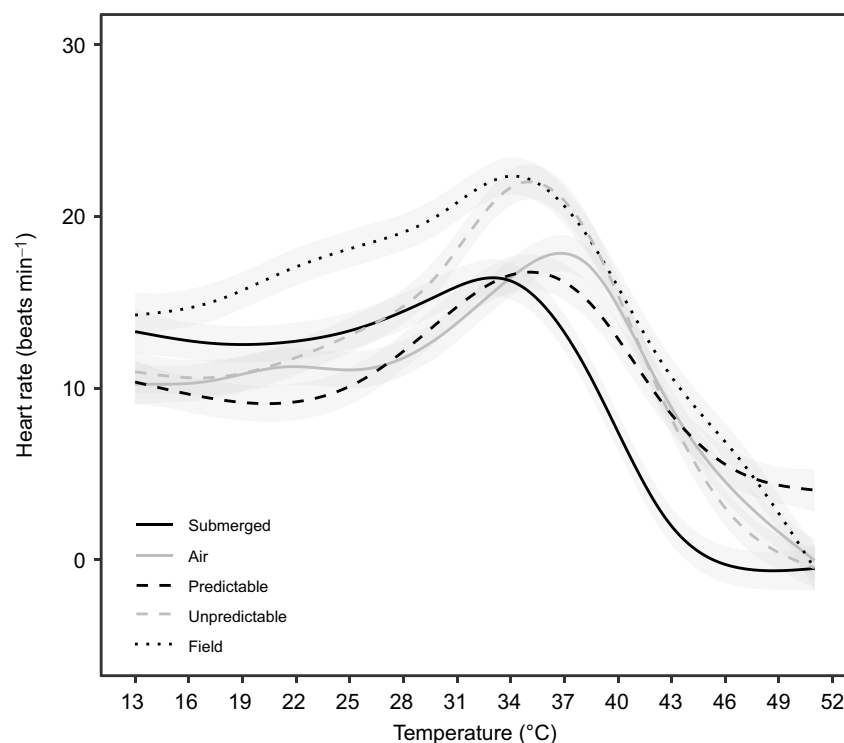**Fig. 4. Generalized additive mixed modelling for heart rates throughout the heat ramp (performed in air) for *M. californianus* from the submerged ( $n=11$ ), air ( $n=11$ ), predictable ( $n=11$ ), unpredictable ( $n=12$ ) and field ( $n=12$ ) acclimation treatments. Statistical differences are reported in Table S1.**



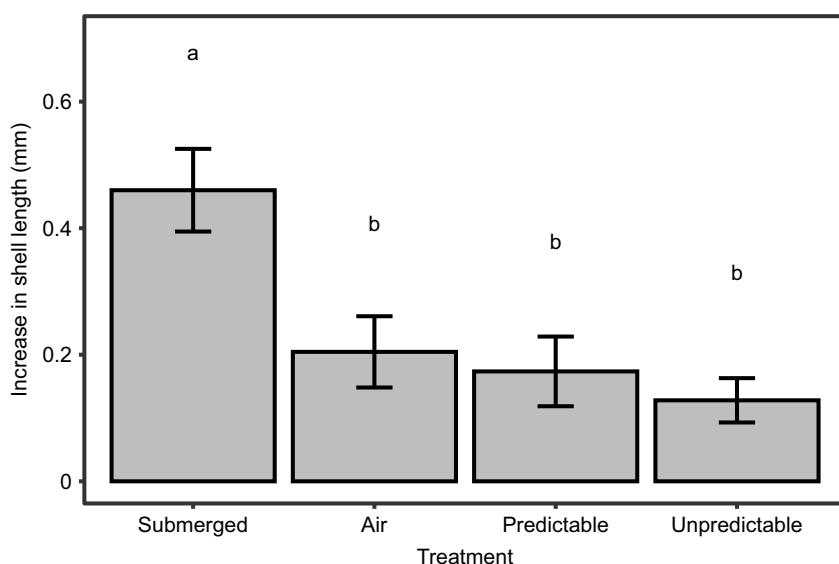

**Fig. 5. Increases in shell length (mm) of *M. californianus* during the 2-week acclimation period in the air ( $n=19$ ), predictable ( $n=18$ ), submerged ( $n=17$ ) and unpredictable ( $n=20$ ) acclimation treatments.** Each bar represents the mean  $\pm$  s.e.m. Differences in letters represent significant differences between acclimation treatments (Kruskal–Wallis test, Dunn's multiple comparison test,  $P<0.05$ ).

unpredictable regime would tailor their physiology to be able to tolerate a large temperature range by maintaining high levels of energy stores, elevated anaerobic capacity and anticipatory cellular stress response, leading to an elevated thermal tolerance. Our results suggest that acclimation to an unpredictable thermal regime does shape upper thermal tolerance, but acclimation to cyclic air exposure was the predominant factor in increasing upper thermal tolerance in mussels. Furthermore, although mussels in the unpredictable treatment did have elevated glycogen content, there was no priming of cellular stress or anaerobic mechanisms in anticipation of an upcoming low tide period. This suggests a reliance on energy stores to tolerate unpredictable emersion conditions under the temperature range used.

One of the few predictable elements of the intertidal habitat is the movement of the tide, resulting in the shift between aquatic and aerial environments. Thermal stress typically occurs during air exposure, yet we know surprisingly little about how the predictable environmental element of air exposure may shape thermal performance. Our results suggest that acclimation to cyclic air exposure is the predominant environmental signal for shaping upper

thermal tolerance. This parallels similar research that has been performed in limpets (Drake et al., 2017) and supports previous studies that have shown that thermal tolerance is elevated in air in intertidal organisms compared with thermal tolerance when submerged (Bjelde and Todgham, 2013; Bjelde et al., 2015; Drake et al., 2017; Fusi et al., 2016; Huang et al., 2015; Pasparakis et al., 2016).

Mussels acclimated to cyclic air exposure (i.e. air, predictable, unpredictable and field treatments) had elevated upper thermal limits of cardiac performance (i.e. FLT) compared with submerged mussels. This is perhaps not surprising as the thermal tolerance trial was performed in air. Acclimation to cyclic air exposure could have increased FLT in mussels through physiological adjustments in metabolism that facilitated greater energy efficiency. During air exposure, to avoid desiccation, many *Mytilus* species often do not gape, which results in a shift to anaerobic metabolism (Collins et al., 2020; Connor and Gracey, 2011; Demers and Guderley, 1994; Tagliarolo et al., 2012; Tagliarolo and McQuaid, 2015; Widdows and Shick, 1985). The shift to anaerobic metabolism is often accompanied by a depression of heart rate activity (Collins et al., 2020; Connor and Gracey, 2011; Tagliarolo and McQuaid, 2015) as

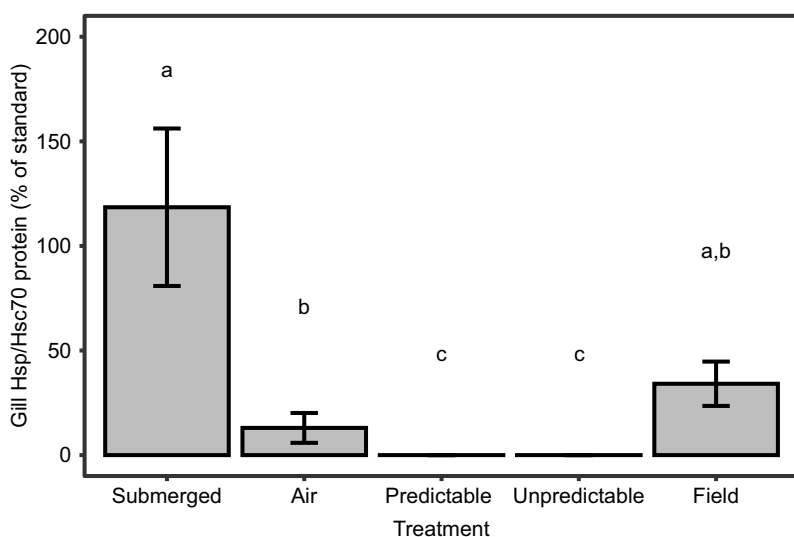

**Fig. 6. Relative levels of Hsp/Hsc70 protein taken just before daytime low tide in the gill tissue of *M. californianus* acclimated to the submerged ( $n=8$ ), air ( $n=9$ ), predictable ( $n=7$ ), unpredictable ( $n=9$ ) or field ( $n=9$ ) treatments.** Protein levels are shown as relative values based on band intensities standardised with the level of Hsc/Hsp70 in a gill tissue sample from the submerged group that had shown positive expression of Hsc/Hsp70 (mean  $\pm$  s.e.m.). Differences in letters represent significant differences between acclimation treatments [Tobit model, pairwise comparisons with multiple-comparison correction (Tukey method),  $P<0.05$ ].



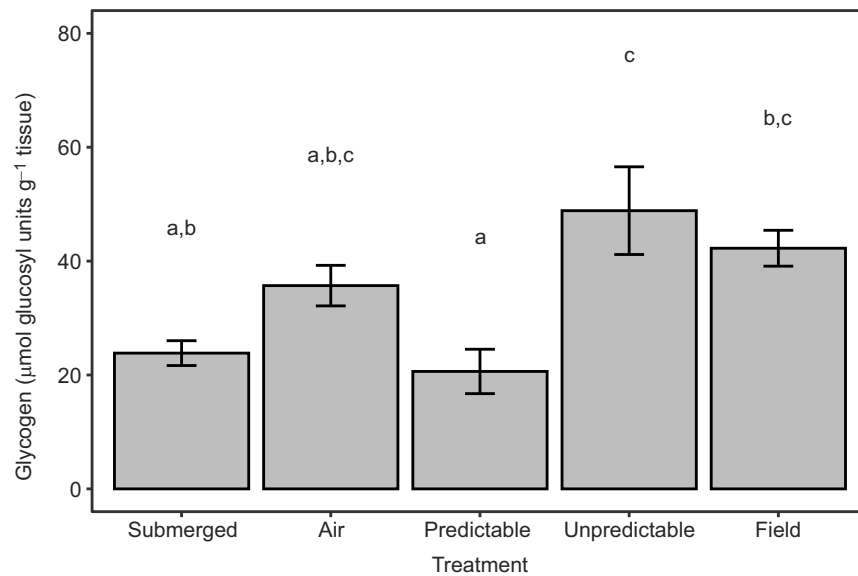

**Fig. 7. Glycogen content taken just before daytime low tide of mantle tissue in *M. californianus* acclimated to the submerged ( $n=8$ ), air ( $n=9$ ), predictable ( $n=7$ ), unpredictable ( $n=9$ ) or field ( $n=9$ ) treatments.** Each bar represents the mean  $\pm$  s.e.m. Differences in letters represent significant differences between acclimation treatments (one-way ANOVA, Tukey's HSD,  $P < 0.05$ ).

well as the reduction of activities such as digestion or excretion to enhance or maintain energy balance (Connor and Gracey, 2011; Widdows and Shick, 1985) during air exposure. Studies have shown that when acclimated to cyclic air exposure, *Mytilus* spp. may decrease resting heart rate (Bahmet et al., 2005; Collins et al., 2020; Pickens, 1965) and metabolic rate (Demers and Guderley, 1994; Widdows and Shick, 1985) via methods such as enhanced metabolic depression (Demers and Guderley, 1994) or increased metabolic capacity (Andrade et al., 2019), which improved energy efficiency to sustain physiological performance during stress. Together, these suggest that mussels acclimated to a tidal cycle in this study could have made metabolic adjustments that enhanced energy efficiency during air exposure, which promoted increased tolerance to thermal stress.

Mussels acclimated to an unpredictable regime can prolong optimal cardiac performance to higher temperatures as evidenced by having higher final BPT in comparison to submerged mussels. Acclimation to elevated or fluctuating temperatures has also been shown to increase upper thermal tolerance of intertidal organisms (Cheng et al., 2018; Giomi et al., 2016; Kern et al., 2015; Oliver and Palumbi, 2011; Schaefer and Ryan, 2006; Schoepf et al., 2015). It is noteworthy that mussels in the predictable regime did not show an increase in BPT in comparison to submerged mussels. Instead, elements of the stochastic temperature regime rather than thermal fluctuation alone influenced BPT. Higher BPTs in mussels from the unpredictable thermal regime could be due to a number of reasons that centre around differences in predictability, magnitudes of temperature variability and magnitude, and immediate thermal history between the two thermal acclimation treatments. Although mussels acclimated to the predictable and unpredictable regime experienced the same total heating over the acclimation period, mussels from the unpredictable treatments experienced a wider variety of temperatures (13–28°C) and higher maximum temperature (28°C) compared with mussels in the predictable treatment (13–20°C). Organisms that experience high thermal variability in comparison to medium/low thermal variability have higher thermal tolerance (Kern et al., 2015; Otto and Rice, 1974; Schaefer and Ryan, 2006; Schoepf et al., 2015) and both the increased thermal variability and exposure to a higher maximum temperature could have contributed to the difference in BPT between mussels acclimated to the predictable and unpredictable treatment.

Recent literature investigating the influence of unpredictable thermal environments in comparison to predictable has primarily focused on evolutionary differences through offspring or life-history traits (Manenti et al., 2014, 2015, 2017; Shama, 2017; Sørensen et al., 2020). Although there are limited studies that have investigated the effects thermal stochasticity in a short-term capacity, Drake and colleagues (2017) investigated the role of different unpredictable thermal regimes that had the same set of daily maximum temperatures but in different orders in the intertidal limpet *Lottia digitalis*, and concluded that it was likely immediate thermal history (i.e. low tide temperatures the last few days before) in addition to unpredictability that influenced upper thermal tolerance. In our unpredictable treatment, two of the three daytime low tide periods prior to the thermal ramp were relatively warm (28°C, 18°C and 25°C), compared with the consistent 20°C low tide conditions of the predictable treatment, and this immediate history could have influenced cardiac responses to the subsequent upper thermal tolerance trial. In *L. digitalis*, prior exposure to aerial temperatures between 25–35°C in the summer and 20°C in winter the day before a critical thermal ramp increased thermal tolerance (Pasparakis et al., 2016). This ‘heat-hardening’ effect has been shown in other mollusc species (Dong et al., 2008; Dunphy et al., 2018; Zhang et al., 2021), including *M. californianus* (Moyen et al., 2020), and could contribute towards the elevated thermal tolerance exhibited by mussels acclimated to the unpredictable treatment in this study. From our study, we cannot discern whether it is the stochastic nature of temperature exposure, the degree of thermal variability or immediate thermal history (or likely, a combination of all) of the unpredictable regime that is an important modulator of upper critical thermal limits of cardiac performance. Our results do provide support that complexities in environmental temperature beyond simple shifts in mean temperature are important considerations in understanding thermal tolerance of intertidal organisms.

Our results for the temperature at BPT and FLT are higher than has been previously reported for this species (see Moyen et al., 2019). A possible reason for this is the difference between actual mussel temperature and our Robomussel temperature. Although Robomussels have been shown to accurately reflect live mussel temperatures within 2.5°C (Fitzhenry et al., 2004; Helmuth and Hofmann, 2001; Helmuth et al., 2016; Jost and Helmuth, 2007), as

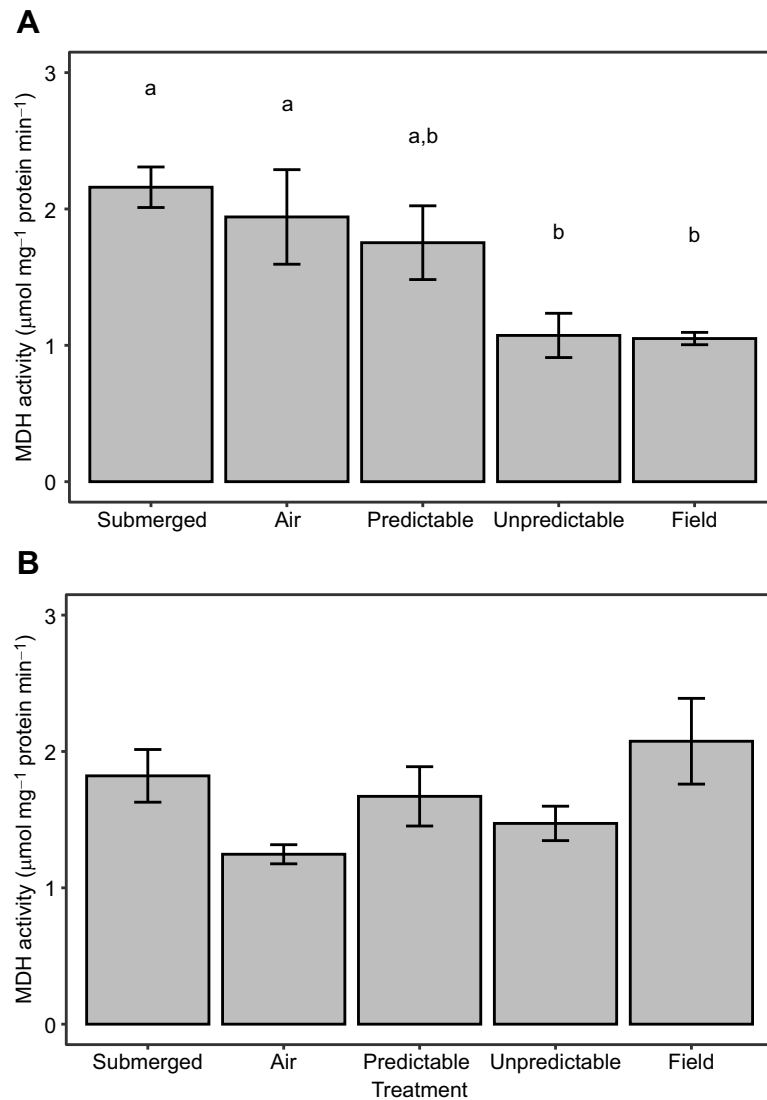

**Fig. 8. Malate dehydrogenase (MDH) activity taken just before daytime low tide of gill and mantle tissue in *M. californianus* acclimated to the submerged ( $n=8$ ), air ( $n=9$ ), predictable ( $n=7$ ), unpredictable ( $n=9$ ) or field ( $n=9$ ) treatments. (A) Gill tissue. (B) Mantle tissue. Each bar represents the mean  $\pm$  s.e.m. Differences in letters represent significant differences between acclimation treatments (one-way ANOVA, Tukey's HSD,  $P < 0.05$ ).**

we did not directly measure each live mussel temperature during the thermal ramp, it may be possible that our Robomussels overestimated mussel body temperature at BPT and FLT.

The mechanisms underpinning the enhanced cardiac performance (exhibited by the thermal performance curves) displayed by mussels acclimated to the unpredictable treatment is likely due to an increase in cardiac capacity (represented here by maximum heart rate) and elevated initial energy stores allowing for prolonged maintenance of optimal performance with increasing temperatures. Performance during thermal stress relies on sufficient energy reserves to meet the rising energy demand (Klepsatel et al., 2016; Sokolova et al., 2012) and elevated initial glycogen stores can result in increased thermal tolerance (Cheng et al., 2018; Dunphy et al., 2006; Willis et al., 2021). In line with our predictions, acclimation to an unpredictable regime increased mantle glycogen content in mussels, suggesting that having sufficient energy stores is an important component for tolerating unpredictable thermal stress during low tide periods. Interestingly, acclimation to predictable or unpredictable thermal regimes had markedly different effects on glycogen content in *M. californianus*. Although the unpredictable treatment had the highest glycogen content, mussels from the predictable treatment exhibited the lowest levels of glycogen content. This suggests that mussels could exhibit different

strategies for energy allocation when presented with predictable or unpredictable thermal stress. Environmental predictability has been shown to be a crucial determinant of energy allocation in empirical studies (Fischer et al., 2009, 2011). Under stochastic conditions, energy stores are expected to play a central role in buffering unpredictable fluctuations, whereas in predictable environments, they play a smaller role and more emphasis is placed on maximising reproductive capacity (Fischer et al., 2011). This has been seen in the limpet *Siphonaria japonica*, where individuals from hotter, but predictable, environments have a higher reproductive output than those from more benign, but unpredictable, thermal environments (Wang et al., 2020). Moreover, gametogenesis in bivalves is often at the expense of glycogen reserves, resulting in low levels of glycogen but elevated reproductive output (Berthelin et al., 2000). As there was no difference in growth of mussels between predictable and unpredictable treatments in this study, and metabolic capacity was similar (see discussion below), the difference in glycogen content between mussels acclimated to the predictable and unpredictable treatment could be due to a difference in reproductive investment.

Similarity of MDH activity and succinate content between predictable and unpredictable (and field) mussels suggests comparable metabolic demands. We predicted that acclimation to

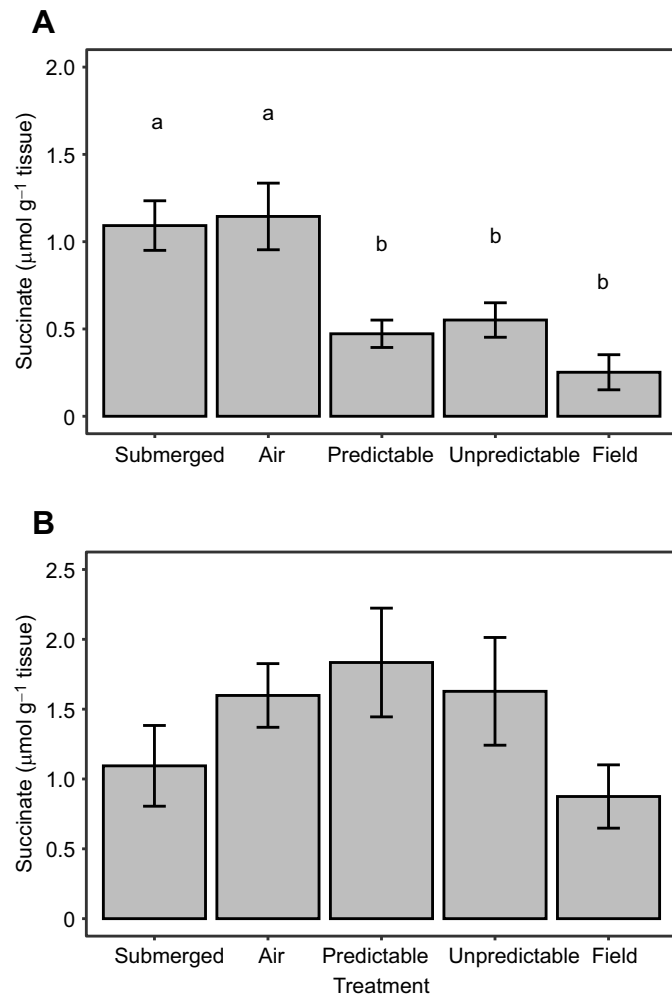

**Fig. 9. Succinate content taken just before daytime low tide of gill and mantle tissue in *M. californianus* acclimated to either submerged ( $n=9$ ), air ( $n=9$ ), predictable ( $n=7$ ), unpredictable ( $n=9$ ) or field ( $n=9$ ) treatments. (A) Gill tissue. (B) Mantle tissue. Each bar represents the mean  $\pm$  s.e.m. Differences in letters represent significant differences between acclimation treatments (one-way ANOVA, Tukey's HSD,  $P < 0.05$ ).**

unpredictable regime would result in elevated MDH activity in preparation for utilising anaerobic metabolism during unpredictable thermal stress during daytime low tide. We predicted this preparation for anaerobic metabolism would be reflected in higher succinate content as well. Surprisingly, we found that gill tissue of mussels acclimated to unpredictable and field (and to a lesser degree, predictable) treatments had lower levels of MDH activity and succinate content in comparison to mussels in the submerged treatment. Both MDH and succinate play an important role in the tricarboxylic acid cycle as well as anaerobic pathways in bivalves (Logan et al., 2012; Dunphy et al., 2018). Therefore, MDH activity is thought to be a good biochemical proxy for metabolic rate (Dahlhoff and Menge, 1996; Dahlhoff et al., 2002; Dahlhoff, 2004; Logan et al., 2012), especially as anaerobic metabolism can contribute ~20% of total metabolic rate during normoxia in *Mytilus* spp. (Hammen, 1980; Wang and Widdows, 1993). The lower levels of MDH activity and succinate content exhibited by mussels in the tidal treatments accompanied by temperature fluctuations could indicate evidence of increased metabolic efficiency, as lower MDH activities are associated with lower maintenance costs in *Mytilus* spp. (Lockwood and Somero, 2011) and thus lower metabolic rates

(Dahlhoff et al., 2002). Studies have shown that exposure to fluctuating thermal regimes can also be more energetically costly (Kern et al., 2015; Ruel and Ayres, 1999; Schaefer and Ryan, 2006; Williams et al., 2012) and result in lower routine metabolic rate (Dame and Vernberg, 1978; Dong and Dong, 2006; Marshall et al., 2021; Tian et al., 2004; Verheyen and Stoks, 2019; Widdows, 1976) than constant regimes at the same mean temperature. Together, it could be possible that in our study, acclimation to fluctuating thermal stress during daytime low tide resulted in increased metabolic efficiency and a decreased reliance on anaerobic metabolism, which is reflected with lower levels of MDH activity and succinate content. Seasonal comparisons of MDH activity in oysters display a similar pattern, where summer-acclimated *Crassostrea gigas* exhibit lower MDH activity in the gills than winter-acclimated individuals under the same temperature (Greenway and Storey, 1999), indicating some degree of seasonal thermal acclimatisation (Greenway and Storey, 1999). Little is known about how thermal acclimation affects succinate levels in the gills of bivalves, but due to its role in similar pathways as MDH, it is reasonable to suggest that the lower levels here are also a product of increased metabolic efficiency.

We measured MDH activity and succinate content in both gill and mantle because we were interested to see how thermal predictability influenced metabolic changes in an energy-dependent tissue (gill) and an energy storage tissue (mantle) to better understand metabolic dynamics in relation to tissue function. Our results suggest tissue-specific differences in MDH activity and succinate content that are likely reflective of differences in energy demand between the two tissues. The primary function of the gill is for gas exchange and filter feeding, which are energetically demanding processes that constitute a significant portion of whole-organism metabolic rate in *M. edulis* (Riisgård and Larsen, 2015; Stapp et al., 2017). Whole-organism measures of these traits (such as oxygen consumption and filtration rate) as well as gill enzyme activity have been shown to be highly influenced by thermal acclimation (Koehn and Immermann, 1981; Widdows and Bayne, 1971). In comparison, the mantle is the primary site for reproductive activity and energy storage in *Mytilus* spp. and is overall a less metabolically active tissue than gill tissue (Stapp et al., 2017), and mantle metabolism has previously been shown to be relatively insensitive to thermal acclimation (Gabbott and Bayne, 1973; Koehn and Immermann, 1981; Widdows, 1978). A seasonal comparison of MDH activity between winter and summer in gill and mantle tissues of *M. edulis* has shown that MDH activity of gill tissue was lower in the summer than in the winter, but MDH activity of mantle tissue remained the same (Greenway and Storey, 1999), suggesting that differences in physiological function could underlie the tissue-specific effects found in the present study.

In terms of energy allocation to growth (indicated here by increase in shell length), we found that acclimation to a tidal cycle was the predominant factor affecting growth rates in *M. californianus*. We predicted that the combination of cyclic air exposure from the tidal cycle coupled with unpredictable thermal stress during daytime low tide would present the most energetically costly scenario, and therefore expected mussels in the unpredictable treatment to have the lowest growth rates. We found that restrictions in shell growth were predominantly controlled by acclimation to a tidal cycle in *M. californianus*, with mussels in tidal treatments having lower growth rates than those in the submerged treatment. Intertidal species often exhibit reduced growth in comparison to their subtidal conspecifics (Harger, 1970; Menge et al., 1994), predominantly owing to decreased feeding and/or calcification time coupled with increased stress during air exposure. Tidal treatments

(air, predictable, unpredictable) had varying levels of stress during air exposure, but similar growth rates, suggesting that the decreased growth rate in tidal treatments was not strongly influenced by stress during air exposure. In the present study, food levels were controlled, and therefore the difference in growth was likely due to the differences in available calcification time between the submerged and tidal treatments. Daily growth rates typically increase with submergence time in *Mytilus* spp. (Pannella, 1976; Buschbaum and Saier, 2001) as calcification cannot occur in air (Tagliarolo et al., 2012). It is also possible that by only using increases in shell length as a proxy for growth, we may have missed changes in other attributes associated with growth in tidal mussels. For example, previous studies have reported that mussels permanently submerged grow longer thinner shells, whereas intertidal individuals possess thicker shells and larger adductor muscles to increase protection from waves, desiccation and temperature variations (Alyakrinskaya, 2005; Tagliarolo and McQuaid, 2015; Vermeij, 1973). Assessment in other aspects of shell morphometrics and/or other measurements for growth over a longer time frame would be needed to confirm whether there is a difference in growth between the treatments.

Acclimation to predictable or unpredictable temperatures during daytime low tide did not produce a preparatory response for Hsp/Hsc70 in *M. californianus*. The antibody used in the present study can detect both the inducible Hsp70 and its constitutively expressed form, heat shock cognate 70 (Hsc70) (but it cannot distinguish between the two), and thus we were surprised that acclimation to predictable or unpredictable temperatures did not result in an increase in inducible Hsp70 or constitutive Hsc70. This is in contrast with previous studies in limpets, gastropods and corals that have shown evidence of 'preparative defence' (Dong et al., 2008) or cellular 'frontloading' (Barshis et al., 2013), where species prepare for a period of anticipated stress by upregulating Hsp70 or Hsc70 (Dong et al., 2008) in advance. In the present study, we expected mussels that were anticipating thermal stress to prime their cellular stress response to proactively defend against cellular damage, particularly in the predictable treatment, where heat stress was anticipated, and upregulate Hsc/Hsp70 prior to daytime low tide periods. With regards to the inducible form, it is possible that Hsp70 was induced during thermal stress in the predictable and unpredictable treatments, but returned to basal levels before the next daytime low tide period (18 h later), which matches the temporal pattern seen in the intertidal snails *Tegula* sp. (Tomanek and Somero, 2000). It is also possible the temperature during daytime low tide in the predictable treatment (20°C: 7°C increase from water temperature) was not stressful enough to result in protein denaturation, an important signal to initiate anticipatory Hsc/Hsp70 mechanisms. Studies on the induction of Hsp70 production in *M. californianus* in response to thermal stress have shown that although heat shock transcription factor 1 (HSF1) is activated with relatively small increases in temperature, Hsp70 synthesis in the gill does not occur on average until 23°C in mussels acclimated to similar temperature as the present study (13°C) (Buckley et al., 2001). Similarly, Roberts et al. (1997) found synthesis of Hsp70 to be between 20°C and 25°C in field-acclimated and lab-acclimated *M. californianus*, as did Halpin et al. (2004). Nevertheless, as we did not measure Hsp70 protein expression during the daytime low tide period, it is not possible to know whether that was the case.

The lack of Hsc70 protein expression suggests that neither the predictable nor unpredictable temperatures triggered a thermally sensitive increase in protein synthesis rates, which has been associated with a rise in Hsc70 (Buckley et al., 2001). Our results

also reflect that of Buckley et al. (2001), who saw no increase in Hsc70 in *M. trossulus* that were acclimated to warm summer temperatures. Therefore, unlike the preparatory response that has been reported in limpets when acclimated to predictable thermal stress (Dong et al., 2008), *M. californianus* does not appear to increase Hsc70 levels as a preparatory response to thermal stress within the temperature range of this study. For mussels acclimated to the unpredictable thermal regime, we predicted that the mussels would prime higher levels of Hsp/Hsc70 to be able to tolerate unexpected, but potentially high levels of thermal stress. Although mussels acclimated to the unpredictable treatment did experience temperatures above the threshold for Hsp70 synthesis, mussels experienced these temperatures in an unpredictable fashion. Synthesis of Hsp70 is energetically expensive, and although a preparatory defence makes this energy investment worthwhile for species/individuals that regularly experience high temperatures (Dong et al., 2008), our results indicate that when these temperatures are experienced stochastically, it is perhaps more beneficial to maintain high energy stores to tolerate high temperatures when they occur, rather than maintain a constitutive elevated level of molecular chaperones to tolerate unpredictable warm days. This is especially true considering our experiment was conducted in March, where temperatures are generally cooler (but where sun exposure produces unpredictably warm days). An avenue for future work would be to see whether the predictable and unpredictable treatments are still similar when the average temperature (i.e. predictable treatment) reflects Hsp70 induction temperatures (i.e. 25°C+). Interestingly, the highest levels of Hsp/Hsc70 were found in mussels acclimated to the submerged treatment. This could be related to the episodes of spontaneous bradycardia and metabolic shifts produced by *M. californianus* acclimated to permanent submersion (Gracey and Connor, 2016), and indicates that acclimation to permanent submersion in intertidal organisms may result in cellular stress and perhaps are not optimum conditions for an intertidal individual.

In conclusion, the results of the present study highlighted two main findings. Firstly, cyclic air exposure is a major factor in shaping thermal performance that has been highlighted in earlier studies (Bjelde and Todgham, 2013; Collins et al., 2020; Drake et al., 2017; Roberts et al., 1997). Secondly, the predictability of the thermal regime affects cardiac performance and mechanisms of energy storage in the form of glycogen. Mussels from the unpredictable treatment had elevated cardiac capacity, which led to elevated BPT over submerged mussels; this pattern was not reflected in mussels from the predictable treatment. Mussels acclimated to unpredictable thermal regimes also had elevated glycogen levels in comparison to mussels from the predictable treatment and, combined with the elevated cardiac capacity, could have aided in increasing cardiac performance during thermal stress. Moving forward, physiological studies performed in the lab to predict the physiological performance of wild mussels should look towards incorporating thermal complexity within a tidal framework to more accurately simulate the intertidal environment and assess sensitivity and tolerance to environmental change. Differences in preparatory strategy between mussels in the unpredictable and predictable treatments warrants further investigation, and assessment of the mechanistic underpinnings of these responses during thermal stress will help to understand strategic differences in physiological performance. Similarly, from our results and others (e.g. Drake et al., 2017; Moyon et al., 2019; Pasparakis et al., 2016), it is becoming increasingly clear that the magnitude of thermal stress is not the only aspect of the thermal signal that plays a role in shaping thermal performance. We focused on incorporating some



key aspects of the *in situ* thermal signal (air exposure, thermal fluctuation, predictability) to understand how these elements shaped physiological performance in *M. californianus*. Our work identified important physiological differences in the unpredictable treatment, but our design did not allow for us to tease apart what specific underlying aspects of the unpredictable regime led to differences in physiological performance. Further work is needed to identify how different elements of the unpredictable regime (unpredictability, thermal history, thermal magnitude, thermal variability) specifically shapes physiological performance, especially under hotter (summer) conditions. For example, comparing thermal regimes that experience predictable or unpredictable thermal variation with the same maximum temperatures would aid in understanding specifically the role of unpredictability in shaping physiological performance. Furthermore, as the intertidal has varying levels of predictability on a temporal scale, assessing how stochasticity integrates across a longer time scale (month, season or year) will highlight the importance of predictability (and unpredictability) in shaping physiological performance. Lastly, identifying how specific components of the thermal signal, such as the medium of thermal stress (air or water), interact with other variables that are often intertwined with changes in temperature (such as food availability) will be crucial to accurately predict how intertidal organisms will respond to climate change. Climate change has been linked with changes in abundance and community composition of phytoplankton (Boyce et al., 2010; Tortell et al., 2002) and alterations in upwelling gradients (Wang et al., 2015). How these variations will interact with thermal stochasticity could be crucial in informing performance.

#### Acknowledgements

We thank Jackie Sones for assistance and access to Bodega Marine Reserve for Robomussel deployment, and Joe Newman for algae culturing and Karl Menard for provision of lab facilities at Bodega Marine Laboratory. We also thank two anonymous reviewers for their helpful suggestions in improving the manuscript.

#### Competing interests

The authors declare no competing or financial interests.

#### Author contributions

Conceptualization: S.J.N., A.E.T.; Methodology: S.J.N., A.E.T.; Formal analysis: S.J.N.; Investigation: S.J.N.; Resources: A.E.T.; Data curation: S.J.N.; Writing - original draft: S.J.N.; Writing - review & editing: A.E.T.; Visualization: S.J.N.; Supervision: A.E.T.; Project administration: A.E.T.; Funding acquisition: A.E.T.

#### Funding

This work was supported by the National Science Foundation (IOS-1557496 to A.E.T.). Additional funding was provided by a Jastro Shields Fellowship to S.J.N. and by the Agricultural Experimental Station of University of California Davis (CA-D-ASC-2252-H) to A.E.T.

#### References

- Alyakrinskaya, I. O. (2005). Functional significance and weight properties of the shell in some mollusks. *Biol. Bull.* **32**, 397-418. doi:10.1007/s10525-005-0118-y
- Andrade, M., De Marchi, L., Soares, A. M. V. M., Rocha, R. J. M., Figueira, E. and Freitas, R. (2019). Are the effects induced by increased temperature enhanced in *Mytilus galloprovincialis* submitted to air exposure? *Sci. Total Environ.* **647**, 431-440. doi:10.1016/j.scitotenv.2018.07.293
- Anestis, A., Pörtner, H. O. and Michaelidis, B. (2010). Anaerobic metabolic patterns related to stress responses in hypoxia exposed mussels *Mytilus galloprovincialis*. *J. Exp. Mar. Biol. Ecol.* **394**, 123-133. doi:10.1016/j.jembe.2010.08.008
- Angélli, O., Stone, D., Wehner, M., Paciorek, C. J., Krishnan, H. and Collins, W. (2017). An independent assessment of anthropogenic attribution statements for recent extreme temperature and rainfall events. *J. Clim.* **30**, 5-16. doi:10.1175/JCLI-D-16-0077.1
- Angilletta, M. J., Jr, Zelic, M. H., Adrian, G. J., Hurliman, A. M. and Smith, C. D. (2013). Heat tolerance during embryonic development has not diverged among populations of a widespread species (*Sceloporus undulatus*). *Conserv. Physiol.* **1**, cot018. doi:10.1093/conphys/cot018
- Bahmet, I. N., Berger, V. J. and Halaman, V. V. (2005). Heart rate in the blue mussel *Mytilus edulis* (Bivalvia) under salinity change. *Russian J. Mar. Biol.* **31**, 314-317. doi:10.1007/s11179-005-0094-6
- Baldwin, J. W., Dessy, J. B., Vecchi, G. A. and Oppenheimer, M. (2019). Temporally compound heat wave events and global warming: an emerging hazard. *Earth's Future* **7**, 411-427. doi:10.1029/2018EF000989
- Barshis, D. J., Ladner, J. T., Oliver, T. A., Seneca, F. O., Traylor-Knowles, N. and Palumbi, S. R. (2013). Genomic basis for coral resilience to climate change. *Proc. Natl Acad. Sci. USA* **110**, 1387-1392. doi:10.1073/pnas.1210224110
- Bayne, B. L., Bayne, C. J., Carefoot, T. C. and Thompson, R. J. (1976). The physiological ecology of *Mytilus californianus* Conrad. *Oecologia* **22**, 229-250. doi:10.1007/BF00344794
- Bergmeyer, H. U. (1983). *Methods of Enzymatic Analysis*. New York: Academic Press.
- Berthelin, C., Kellner, K. and Mathieu, M. (2000). Storage metabolism in the Pacific oyster (*Crassostrea gigas*) in relation to summer mortalities and reproductive cycle (West Coast of France). *Comp. Biochem. Physiol. B Biochem. Mol. Biol.* **125**, 359-369. doi:10.1016/S0305-0491(99)00187-X
- Beutler, H. O. (1989). Succinate. In *Methods of Enzymatic Analysis*, 3rd edn, Vol. VII (ed. H. U. Bergmeyer), pp. 25-33. Cambridge: VCH Publishers.
- Bjelde, B. E. and Todgham, A. E. (2013). Thermal physiology of the fingered limpet *Lottia digitalis* under emersion and immersion. *J. Exp. Biol.* **216**, 2858-2869. doi:10.1242/jeb.084178
- Bjelde, B. E., Miller, N. A., Stillman, J. H. and Todgham, A. E. (2015). The role of oxygen in determining upper thermal limits in *Lottia digitalis* under air exposure and submersion. *Physiol. Biochem. Zool.* **88**, 483-493. doi:10.1086/682220
- Boyce, D. G., Lewis, M. R. and Worm, B. (2010). Global phytoplankton decline over the past century. *Nature* **466**, 591-596. doi:10.1038/nature09268
- Buckley, L. B. and Kingsolver, J. G. (2012). Functional and phylogenetic approaches to forecasting species' responses to climate change. *Annu. Rev. Ecol. Syst.* **43**, 205-226. doi:10.1146/annurev-ecolsys-110411-160516
- Buckley, B. A., Owen, M.-E. and Hofmann, G. E. (2001). Adjusting the thermostat: the threshold induction temperature for the heat-shock response in intertidal mussels (genus *Mytilus*) changes as a function of thermal history. *J. Exp. Biol.* **204**, 3571-3579. doi:10.1242/jeb.204.20.3571
- Burggren, W. (2018). Developmental phenotypic plasticity helps bridge stochastic weather events associated with climate change. *J. Exp. Biol.* **221**, jeb161984. doi:10.1242/jeb.161984
- Burggren, W. W. (2019). Inadequacy of typical physiological experimental protocols for investigating consequences of stochastic weather events emerging from global warming. *Am. J. Physiol. Regul. Integr. Comp. Physiol.* **316**, R318-R322. doi:10.1152/ajpregu.00307.2018
- Burnett, N. P., Seabra, R., de Pirro, M., Wetthey, D. S., Woodin, S. A., Helmuth, B., Zippay, M. L., Sarà, G., Monaco, C. and Lima, F. P. (2013). An improved noninvasive method for measuring heartbeat of intertidal animals. *Limnol. Oceanogr.* **11**, 91-100. doi:10.4319/lom.2013.11.91
- Buschbaum, C. and Saier, B. (2001). Growth of the mussel *Mytilus edulis* L. in the Wadden Sea affected by tidal emergence and barnacle epibionts. *J. Sea Res.* **45**, 27-36. doi:10.1016/S1385-1101(00)00061-7
- Cheng, M. C. F., Sarà, G. and Williams, G. A. (2018). Combined effects of thermal conditions and food availability on thermal tolerance of the marine bivalve, *Perna viridis*. *J. Therm. Biol.* **78**, 270-276. doi:10.1016/j.jtherbio.2018.10.014
- Collins, C. L., Burnett, N. P., Ramsey, M. J., Wagner, K. and Zippay, M. L. (2020). Physiological responses to heat stress in an invasive mussel *Mytilus galloprovincialis* depend on tidal habitat. *Mar. Environ. Res.* **154**, 104849. doi:10.1016/j.marenvres.2019.104849
- Connor, K. M. and Gracey, A. Y. (2011). Circadian cycles are the dominant transcriptional rhythm in the intertidal mussel *Mytilus californianus*. *Proc. Natl Acad. Sci. USA* **108**, 16110-16115. doi:10.1073/pnas.1111076108
- Connor, K. M. and Gracey, A. Y. (2012). High-resolution analysis of metabolic cycles in the intertidal mussel *Mytilus californianus*. *Am. J. Physiol. Regul. Integr. Comp. Physiol.* **302**, R103-R111. doi:10.1152/ajpregu.00453.2011
- da Silva, C. R. B., Riginos, C. and Wilson, R. S. (2019). An intertidal fish shows thermal acclimation despite living in a rapidly fluctuating environment. *J. Comp. Physiol. B* **189**, 385-398. doi:10.1007/s00360-019-01212-0
- Dahlhoff, E. P. (2004). Biochemical indicators of stress and metabolism: applications for marine ecological studies. *Annu. Rev. Physiol.* **66**, 183-207. doi:10.1146/annurev.physiol.66.032102.114509
- Dahlhoff, E. P. and Menge, B. A. (1996). Influence of phytoplankton concentration and wave exposure on the ecophysiology of *Mytilus californianus*. *Mar. Ecol. Prog. Ser.* **144**, 97-107. doi:10.3354/meps144097
- Dahlhoff, E. P., Stillman, J. H. and Menge, B. A. (2002). Physiological community ecology: variation in metabolic activity of ecologically important rocky intertidal invertebrates along environmental gradients. *Integr. Comp. Biol.* **42**, 862-871. doi:10.1093/icb/42.4.862
- Dame, R. F. and Vernberg, F. J. (1978). The influence of constant and cyclic acclimation temperatures on the metabolic rates of *Panopeus herbstii* and *Uca pugnator*. *Biol. Bull.* **154**, 188-197. doi:10.2307/1541121

- Demers, A. and Guderley, H. (1994). Acclimatization to intertidal conditions modifies the physiological response to prolonged air exposure in *Mytilus edulis*. *Mar. Biol.* **118**, 115–122. doi:10.1007/BF00699225
- Depledge, M. H., Lundebye, A.-K., Curtis, T., Aagaard, A. and Andersen, B. B. (1996). Automated interpulse-duration assessment (AIDA): a new technique for detecting disturbances in cardiac activity in selected macroinvertebrates. *Mar. Biol.* **126**, 313–319. doi:10.1007/BF00347455
- Dillon, M. E., Woods, H. A., Wang, G., Fey, S. B., Vasseur, D. A., Telemeco, R. S., Marshall, K. and Pincebourde, S. (2016). Life in the frequency domain: the biological impacts of changes in climate variability at multiple time scales. *Integr. Comp. Biol.* **56**, 14–30. doi:10.1093/icb/icw024
- Doak, D. F. and Morris, W. F. (2010). Demographic compensation and tipping points in climate-induced range shifts. *Nature* **467**, 959. doi:10.1038/nature09439
- Dong, Y. and Dong, S. (2006). Growth and oxygen consumption of the juvenile sea cucumber *Apostichopus japonicus* (Selenka) at constant and fluctuating water temperatures. *Aquac. Res.* **37**, 1327–1333. doi:10.1111/j.1365-2109.2006.01570.x
- Dong, Y., Miller, L. P., Sanders, J. G. and Somero, G. N. (2008). Heat-shock protein 70 (Hsp70) expression in four limpets of the genus *Lottia*: interspecific variation in constitutive and inducible synthesis correlates with *in situ* exposure to heat stress. *Biol. Bull.* **215**, 173–181. doi:10.2307/25470698
- Dowd, W. W. and Somero, G. N. (2013). Behavior and survival of *Mytilus* congeners following episodes of elevated body temperature in air and seawater. *J. Exp. Biol.* **216**, 502–514.
- Dowd, W. W., Felton, C. A., Heymann, H. M., Kost, L. E. and Somero, G. N. (2013). Food availability, more than body temperature, drives correlated shifts in ATP-generating and antioxidant enzyme capacities in a population of intertidal mussels (*Mytilus californianus*). *J. Exp. Mar. Biol. Ecol.* **449**, 171–185. doi:10.1016/j.jembe.2013.09.020
- Drake, M. J., Miller, N. A. and Todgham, A. E. (2017). The role of stochastic thermal environments in modulating the thermal physiology of an intertidal limpet, *Lottia digitalis*. *J. Exp. Biol.* **220**, 3072–3083. doi:10.1242/jeb.159020
- Dunphy, B. J., Wells, R. M. G. and Jeffs, A. G. (2006). Oxygen consumption and enzyme activity of the subtidal flat oyster (*Ostrea chilensis*) and intertidal Pacific oyster (*Crassostrea gigas*): responses to temperature and starvation. *N. Z. J. Mar. Freshw. Res.* **40**, 149–158. doi:10.1080/00288330.2006.9517409
- Dunphy, B. J., Ruggiero, K., Zamora, L. N. and Ragg, N. L. C. (2018). Metabolomic analysis of heat-hardening in adult green-lipped mussel (*Perna canaliculus*): a key role for succinic acid and the GABAergic synapse pathway. *J. Therm. Biol.* **74**, 37–46. doi:10.1016/j.jtherbio.2018.03.006
- Fangue, N. A., Mandic, M., Richards, J. G. and Schulte, P. M. (2008). Swimming performance and energetics as a function of temperature in killifish *Fundulus heteroclitus*. *Physiol. Biochem. Zool.* **81**, 389–401. doi:10.1086/589109
- Feldmeth, C. R., Stone, E. A. and Brown, J. H. (1974). An increased scope for thermal tolerance upon acclimating pupfish (*Cyprinodon*) to cycling temperatures. *J. Comp. Physiol.* **89**, 39–44. doi:10.1007/BF00696161
- Fischer, B., Taborsky, B. and Dieckmann, U. (2009). Unexpected patterns of plastic energy allocation in stochastic environments. *Am. Nat.* **173**, E108–E120. doi:10.1086/596536
- Fischer, B., Dieckmann, U. and Taborsky, B. (2011). When to store energy in a stochastic environment. *Evolution* **65**, 1221–1232. doi:10.1111/j.1558-5646.2010.01198.x
- Fitzhenry, T., Halpin, P. M. and Helmuth, B. (2004). Testing the effects of wave exposure, site, and behavior on intertidal mussel body temperatures: applications and limits of temperature logger design. *Mar. Biol.* **145**, 339–349. doi:10.1007/s00227-004-1318-6
- Fusi, M., Cannicci, S., Daffonchio, D., Mostert, B., Pörtner, H.-O. and Giomi, F. (2016). The trade-off between heat tolerance and metabolic cost drives the bimodal life strategy at the air-water interface. *Sci. Rep.* **6**, 1–8. doi:10.1038/srep19158
- Gabbott, P. A. and Bayne, B. L. (1973). Biochemical effects of temperature and nutritive stress on *Mytilus edulis* L. *J. Mar. Biol. Assoc. UK* **53**, 269–286. doi:10.1017/S0025315400022268
- Giomi, F., Mandaglio, C., Ganmanee, M., Han, G.-D., Dong, Y.-W., Williams, G. A. and Sarà, G. (2016). The importance of thermal history: costs and benefits of heat exposure in a tropical, rocky shore oyster. *J. Exp. Biol.* **219**, 686–694. doi:10.1242/jeb.128892
- Gracey, A. Y. and Connor, K. (2016). Transcriptional and metabolomic characterization of spontaneous metabolic cycles in *Mytilus californianus* under subtidal conditions. *Mar. Genomics* **30**, 35–41. doi:10.1016/j.margen.2016.07.004
- Greenway, S. C. and Storey, K. B. (1999). The effect of prolonged anoxia on enzyme activities in oysters (*Crassostrea virginica*) at different seasons. *J. Exp. Mar. Biol. Ecol.* **242**, 259–272. doi:10.1016/S0022-0981(99)00103-3
- Guo, Y., Gasparini, A., Li, S., Sera, F., Vicedo-Cabrera, A. M., Coelho, M. D. S. S., Salvida, P. H. N., Lavigne, E., Tawatsupa, B., Punnasiri, K. et al. (2018). Quantifying excess deaths related to heatwaves under climate change scenarios: a multicountry time series modelling study. *PLoS Med.* **15**, e1002629. doi:10.1371/journal.pmed.1002629
- Halpin, P. M., Menge, B. A. and Hofmann, G. E. (2004). Experimental demonstration of plasticity in the heat shock response of the intertidal mussel *Mytilus californianus*. *Mar. Ecol. Prog. Ser.* **276**, 137–145. doi:10.3354/meps276137
- Hammen, C. S. (1980). Total energy metabolism of marine bivalve mollusks in anaerobic and aerobic states. *Comp. Biochem. Physiol. A Physiol.* **67**, 617–621. doi:10.1016/0300-9629(80)90250-9
- Han, G.-D., Zhang, S., Marshall, D. J., Ke, C.-H. and Dong, Y.-W. (2013). Metabolic energy sensors (AMPK and SIRT1), protein carbonylation and cardiac failure as biomarkers of thermal stress in an intertidal limpet: linking energetic allocation with environmental temperature during aerial emersion. *J. Exp. Biol.* **216**, 3273–3282. doi:10.1242/jeb.084269
- Harger, J. R. (1970). Comparisons among growth characteristics of two species of sea mussels, *Mytilus edulis* and *Mytilus californianus*. *Veliger* **13**, 44–56.
- Harley, C. D. G. (2008). Tidal dynamics, topographic orientation, and temperature-mediated mass mortalities on rocky shores. *Mar. Ecol. Prog. Ser.* **371**, 37–46. doi:10.3354/meps07711
- Hassid, W. Z. and Abraham, S. (1957). Chemical procedures for analysis of polysaccharides. *Methods Enzymol.* **3**, 34–50. doi:10.1016/S0076-6879(57)03345-5
- Helmuth, B. S. T. (1998). Intertidal mussel microclimates: predicting the body temperature of a sessile invertebrate. *Ecol. Monogr.* **68**, 51–74. doi:10.1890/0012-9615(1998)068[0051:IMMPTB]2.0.CO;2
- Helmuth, B. S. T. and Hofmann, G. E. (2001). Microhabitats, thermal heterogeneity, and patterns of physiological stress in the rocky intertidal zone. *Biol. Bull.* **201**, 374–384. doi:10.2307/1543615
- Helmuth, B., Mieszkowska, N., Moore, P. and Hawkins, S. J. (2006). Living on the edge of two changing worlds: forecasting the responses of rocky intertidal ecosystems to climate change. *Annu. Rev. Ecol. Syst.* **37**, 373–404. doi:10.1146/annurev.ecolsys.37.091305.110149
- Helmuth, B., Choi, F., Matzelle, A., Torossian, J. L., Morello, S. L., Mislán, K. A. S., Yamane, L., Strickland, D., Szathmari, P. L., Gilman, S. E. et al. (2016). Long-term, high frequency *in situ* measurements of intertidal mussel bed temperatures using biomimetic sensors. *Scientific Data* **3**, 160087. doi:10.1038/sdata.2016.87
- Hochachka, P. W. and Somero, G. N. (2002). *Biochemical Adaptation: Mechanism and Process in Physiological Evolution*. Oxford University Press.
- Hofmann, G. and Somero, G. (1995). Evidence for protein damage at environmental temperatures: seasonal changes in levels of ubiquitin conjugates and hsp70 in the intertidal mussel *Mytilus trossulus*. *J. Exp. Biol.* **198**, 1509–1518. doi:10.1242/jeb.198.7.1509
- Huang, X., Wang, T., Ye, Z., Han, G. and Dong, Y. (2015). Temperature relations of aerial and aquatic physiological performance in a mid-intertidal limpet *Cellana toreuma*: adaptation to rapid changes in thermal stress during emersion. *Integr. Zool.* **10**, 159–170. doi:10.1111/1749-4877.12107
- IPCC. (2021). Climate Change 2021: The Physical Science Basis. In *Contribution of Working Group I to the Sixth Assessment Report of the Intergovernmental Panel on Climate Change* (ed. V. Masson-Delmotte, P. Zhai, A. Pirani, S. L. Connors and others). Cambridge University Press.
- Ivanina, A. V., Cherkasov, A. S. and Sokolova, I. M. (2008). Effects of cadmium on cellular protein and glutathione synthesis and expression of stress proteins in eastern oysters, *Crassostrea virginica* Gmelin. *J. Exp. Biol.* **211**, 577–586. doi:10.1242/jeb.011262
- Jimenez, A. G., Alves, S., Dallmer, J., Njoo, E., Roa, S. and Dowd, W. W. (2016). Acclimation to elevated emersion temperature has no effect on susceptibility to acute, heat-induced lipid peroxidation in an intertidal mussel (*Mytilus californianus*). *Mar. Biol.* **163**, 55. doi:10.1007/s00227-016-2828-8
- Jost, J. and Helmuth, B. (2007). Morphological and ecological determinants of body temperature of *Geukensia demissa*, the Atlantic ribbed mussel, and their effects on mussel mortality. *Biol. Bull.* **213**, 141–151. doi:10.2307/25066630
- Kern, P., Cramp, R. L. and Franklin, C. E. (2015). Physiological responses of ectotherms to daily temperature variation. *J. Exp. Biol.* **218**, 3068–3076. doi:10.1242/jeb.123166
- Klepsattel, P., Gálíková, M., Xu, Y. and Kühnlein, R. P. (2016). Thermal stress depletes energy reserves in *Drosophila*. *Sci. Rep.* **6**, 1–12. doi:10.1038/srep33667
- Koehn, R. K. and Immermann, F. W. (1981). Biochemical studies of aminopeptidase polymorphism in *Mytilus edulis*. I. Dependence of enzyme activity on season, tissue, and genotype. *Biochem. Genet.* **19**, 1115–1142. doi:10.1007/BF00484569
- Kroecker, K. J., Sanford, E., Rose, J. M., Blanchette, C. A., Chan, F., Chavez, F. P., Gaylord, B., Helmuth, B., Hill, T. M., Hofmann, G. E. et al. (2016). Interacting environmental mosaics drive geographic variation in mussel performance and predation vulnerability. *Ecol. Lett.* **19**, 771–779. doi:10.1111/ele.12613
- Laemmli, U. K. (1970). Cleavage of structural proteins during the assembly of the head of bacteriophage T4. *Nature* **227**, 680–685.
- Lockwood, B. L. and Somero, G. N. (2011). Invasive and native blue mussels (genus *Mytilus*) on the California coast: the role of physiology in a biological invasion. *J. Exp. Mar. Biol. Ecol.* **400**, 167–174. doi:10.1016/j.jembe.2011.02.022
- Logan, C. A., Kost, L. E. and Somero, G. N. (2012). Latitudinal differences in *Mytilus californianus* thermal physiology. *Mar. Ecol. Prog. Ser.* **450**, 93–105. doi:10.3354/meps09491



- Madeira, D., Mendonça, V., Dias, M., Roma, J., Costa, P. M., Larguinho, M., Vinagre, C. and Diniz, M. S. (2015). Physiological, cellular and biochemical thermal stress response of intertidal shrimps with different vertical distributions: *Palaemon elegans* and *Palaemon serratus*. *Comp. Biochem. Physiol. A Mol. Integr. Physiol.* **183**, 107–115. doi:10.1016/j.cbpa.2014.12.039
- Manenti, T., Sørensen, J. G., Moghadam, N. N. and Loeschcke, V. (2014). Predictability rather than amplitude of temperature fluctuations determines stress resistance in a natural population of *Drosophila simulans*. *J. Evol. Biol.* **27**, 2113–2122. doi:10.1111/jeb.12463
- Manenti, T., Loeschcke, V., Moghadam, N. N. and Sørensen, J. G. (2015). Phenotypic plasticity is not affected by experimental evolution in constant, predictable or unpredictable fluctuating thermal environments. *J. Evol. Biol.* **28**, 2078–2087. doi:10.1111/jeb.12735
- Manenti, T., Sørensen, J. G. and Loeschcke, V. (2017). Environmental heterogeneity does not affect levels of phenotypic plasticity in natural populations of three *Drosophila* species. *Ecol. Evol.* **7**, 2716–2724. doi:10.1002/eece3.2904
- Mangan, S., Wilson, R. W., Findlay, H. S. and Lewis, C. (2019). Acid-base physiology over tidal periods in the mussel *Mytilus edulis*: size and temperature are more influential than seawater pH. *Proc. R. Soc. B* **286**, 20182863. doi:10.1098/rspb.2018.2863
- Marshall, D. J. and McQuaid, C. D. (1992). Comparative aerial metabolism and water relations of the intertidal limpets *Patella granularis* L. (Mollusca: Prosobranchia) and *Siphonaria oculus* Kr. (Mollusca: Pulmonata). *Physiol. Zool.* **65**, 1040–1056. doi:10.1086/physzool.65.5.30158558
- Marshall, D. J., Dong, Y.-W., McQuaid, C. D. and Williams, G. A. (2011). Thermal adaptation in the intertidal snail *Echinolittorina malaccana* contradicts current theory by revealing the crucial roles of resting metabolism. *J. Exp. Biol.* **214**, 3649–3657. doi:10.1242/jeb.059899
- Marshall, K. E., Anderson, K. M., Brown, N. E. M., Dytner, J. K., Flynn, K. L., Bernhardt, J. R., Konecny, C. A., Gurney-Smith, H. and Harley, C. D. (2021). Whole-organism responses to constant temperatures do not predict responses to variable temperatures in the ecosystem engineer *Mytilus trossulus*. *Proc. R. Soc. B* **288**, 20202968. doi:10.1098/rspb.2020.2968
- McMahon, B. R., Burggren, W. W., Pinder, A. W. and Wheatly, M. G. (1991). Air exposure and physiological compensation in a tropical intertidal chiton, *Chiton stokesii* (Mollusca: Polyplacophora). *Physiol. Zool.* **64**, 728–747. doi:10.1086/physzool.64.3.30158204
- Menge, B. A., Berlow, E. L., Blanchette, C. A., Navarrete, S. A. and Yamada, S. B. (1994). The keystone species concept: variation in interaction strength in a rocky intertidal habitat. *Ecol. Monogr.* **64**, 249–286. doi:10.2307/2937163
- Miller, L. P. and Dowd, W. W. (2017). Multimodal in situ datalogging quantifies inter-individual variation in thermal experience and persistent origin effects on gaping behavior among intertidal mussels (*Mytilus californianus*). *J. Exp. Biol.* **220**, 4305–4319. doi:10.1242/jeb.164020
- Miller, L. P. and Long, J. D. (2015). A tide prediction and tide height control system for laboratory mesocosms. *PeerJ* **3**, e1442. doi:10.7717/peerj.1442
- Moyen, N. E., Somero, G. N. and Denny, M. W. (2019). Impact of heating rate on cardiac thermal tolerance in the California mussel, *Mytilus californianus*. *J. Exp. Biol.* **222**, jeb203166. doi:10.1242/jeb.203166
- Moyen, N. E., Crane, R. L., Somero, G. N. and Denny, M. W. (2020). A single heat-stress bout induces rapid and prolonged heat acclimation in the California mussel, *Mytilus californianus*. *Proc. R. Soc. B* **287**, 20202561. doi:10.1098/rspb.2020.2561
- Oliver, T. A. and Palumbi, S. R. (2011). Do fluctuating temperature environments elevate coral thermal tolerance? *Coral Reefs* **30**, 429–440. doi:10.1007/s00338-011-0721-y
- Otto, R. G. and Rice, J. O. H. (1974). Swimming speeds of yellow perch (*Perca flavescens*) following an abrupt change in environmental temperature. *J. Fisheries Board Canada* **31**, 1731–1734. doi:10.1139/f74-219
- Paganini, A. W., Miller, N. A. and Stillman, J. H. (2014). Temperature and acidification variability reduce physiological performance in the intertidal zone porcelain crab *Petrolisthes cinctipes*. *J. Exp. Biol.* **217**, 3974–3980. doi:10.1242/jeb.109801
- Pannella, G. (1976). Tidal growth patterns in recent and fossil mollusc bivalve shells: a tool for the reconstruction of paleotides. *Sci. Nat.* **63**, 539–543. doi:10.1007/BF00622786
- Pasparakis, C., Davis, B. E. and Todgham, A. E. (2016). Role of sequential low-tide-period conditions on the thermal physiology of summer and winter laboratory-acclimated fingered limpets, *Lottia digitalis*. *Mar. Biol.* **163**, 23. doi:10.1007/s00227-015-2779-5
- Pickens, P. E. (1965). Heart rate of mussels as a function of latitude, intertidal height, and acclimation temperature. *Physiol. Zool.* **38**, 390–405. doi:10.1086/physzool.38.4.30152416
- Podrabsky, J. E. and Somero, G. N. (2004). Changes in gene expression associated with acclimation to constant temperatures and fluctuating daily temperatures in an annual killifish *Austrofundulus limnaeus*. *J. Exp. Biol.* **207**, 2237–2254. doi:10.1242/jeb.01016
- Rhee, J.-S., Raisuddin, S., Lee, K.-W., Seo, J. S., Ki, J.-S., Kim, I.-C., Park, H. G. and Lee, J.-S. (2009). Heat shock protein (Hsp) gene responses of the intertidal copepod *Tigriopus japonicus* to environmental toxicants. *Comp. Biochem. Physiol. C Toxicol. Pharmacol.* **149**, 104–112. doi:10.1016/j.cbpc.2008.07.009
- Riisgård, H. U. and Larsen, P. S. (2015). Physiologically regulated valve-closure makes mussels long-term starvation survivors: test of hypothesis. *J. Molluscan Stud.* **81**, 303–307. doi:10.1093/mollus/eyu087
- Roberts, D. A., Hofmann, G. E. and Somero, G. N. (1997). Heat-shock protein expression in *Mytilus californianus*: acclimatization (seasonal and tidal-height comparisons) and acclimation effects. *Biol. Bull.* **192**, 309–320. doi:10.2307/1542724
- Ruel, J. J. and Ayres, M. P. (1999). Jensen's inequality predicts effects of environmental variation. *Trends Ecol. Evol.* **14**, 361–366. doi:10.1016/S0169-5347(99)01664-X
- Sagarin, R. D. and Somero, G. N. (2006). Complex patterns of expression of heat-shock protein 70 across the southern biogeographical ranges of the intertidal mussel *Mytilus californianus* and snail *Nucella ostrina*. *J. Biogeogr.* **33**, 622–630. doi:10.1111/j.1365-2699.2005.01403.x
- Schaefer, J. and Ryan, A. (2006). Developmental plasticity in the thermal tolerance of zebrafish *Danio rerio*. *J. Fish Biol.* **69**, 722–734. doi:10.1111/j.1095-8649.2006.01145.x
- Schoepf, V., Stat, M., Falter, J. L. and McCulloch, M. T. (2015). Limits to the thermal tolerance of corals adapted to a highly fluctuating, naturally extreme temperature environment. *Sci. Rep.* **5**, 1–14. doi:10.1038/srep17639
- Shama, L. N. S. (2017). The mean and variance of climate change in the oceans: hidden evolutionary potential under stochastic environmental variability in marine sticklebacks. *Sci. Rep.* **7**, 1–14. doi:10.1038/s41598-017-07140-9
- Sheldon, K. S. (2019). Climate change in the tropics: ecological and evolutionary responses at low latitudes. *Annu. Rev. Ecol. Syst.* **50**, 303–333. doi:10.1146/annurev-ecolsys-110218-025005
- Smith, P. E., Krohn, R. I., Hermanson, G. T., Mallia, A. K., Gartner, F. H., Provenzano, M., Fujimoto, E. K., Goeke, N. M., Olson, B. J. and Klenk, D. C. (1985). Measurement of protein using bicinchoninic acid. *Anal. Biochem.* **150**, 76–85.
- Sokolova, I. M., Frederich, M., Bagwe, R., Lannig, G. and Sukhotin, A. A. (2012). Energy homeostasis as an integrative tool for assessing limits of environmental stress tolerance in aquatic invertebrates. *Mar. Environ. Res.* **79**, 1–15. doi:10.1016/j.marenvres.2012.04.003
- Somero, G. N. (2010). The physiology of climate change: how potentials for acclimatization and genetic adaptation will determine 'winners' and 'losers'. *J. Exp. Biol.* **213**, 912–920. doi:10.1242/jeb.037473
- Sørensen, J. G., Manenti, T., Bechsgaard, J. S., Schou, M. F., Kristensen, T. N. and Loeschcke, V. (2020). Pronounced plastic and evolutionary responses to unpredictable thermal fluctuations in *Drosophila simulans*. *Front. Genet.* **11**, 1333. doi:10.3389/fgene.2020.555843
- Stapp, L. S., Thomsen, J., Schade, H., Bock, C., Melzner, F., Pörtner, H. O. and Lannig, G. (2017). Intra-population variability of ocean acidification impacts on the physiology of Baltic blue mussels (*Mytilus edulis*): integrating tissue and organism response. *J. Comp. Physiol. B Biochem. Syst. Environ. Physiol.* **187**, 529–543. doi:10.1007/s00360-016-1053-6
- Stillman, J. H. (2019). Heat waves, the new normal: summertime temperature extremes will impact animals, ecosystems, and human communities. *Physiology* **34**, 86–100. doi:10.1152/physiol.00040.2018
- Stillman, J. and Somero, G. (1996). Adaptation to temperature stress and aerial exposure in congeneric species of intertidal porcelain crabs (genus *Petrolisthes*): correlation of physiology, biochemistry and morphology with vertical distribution. *J. Exp. Biol.* **199**, 1845–1855. doi:10.1242/jeb.199.8.1845
- Stillman, J. H. and Somero, G. N. (2000). A comparative analysis of the upper thermal tolerance limits of eastern Pacific porcelain crabs, genus *Petrolisthes*: influences of latitude, vertical zonation, acclimation, and phylogeny. *Physiol. Biochem. Zool.* **73**, 200–208. doi:10.1086/316738
- Tagliaro, M. and McQuaid, C. D. (2015). Sub-lethal and sub-specific temperature effects are better predictors of mussel distribution than thermal tolerance. *Mar. Ecol. Prog. Ser.* **535**, 145–159. doi:10.3354/meps11434
- Tagliaro, M., Clavier, J., Chauvaud, L., Koken, M. and Grall, J. (2012). Metabolism in blue mussel: intertidal and subtidal beds compared. *Aquat. Biol.* **17**, 167–180. doi:10.3354/ab00464
- Threader, R. W. and Houston, A. H. (1983). Heat tolerance and resistance in juvenile rainbow trout acclimated to diurnally cycling temperatures. *Comp. Biochem. Physiol. A Physiol.* **75**, 153–155. doi:10.1016/0300-9629(83)90062-2
- Tian, X., Dong, S., Wang, F. and Wu, L. (2004). The effects of temperature changes on the oxygen consumption of juvenile Chinese shrimp *Fenneropenaeus chinensis* Osbeck. *J. Exp. Mar. Biol. Ecol.* **310**, 59–72. doi:10.1016/j.jembe.2004.04.002
- Todgham, A. E., Schulte, P. M. and Iwama, G. K. (2005). Cross-tolerance in the tidepool sculpin: the role of heat shock proteins. *Physiol. Biochem. Zool.* **78**, 133–144. doi:10.1086/425205
- Todgham, A. E., Iwama, G. K. and Schulte, P. M. (2006). Effects of the natural tidal cycle and artificial temperature cycling on Hsp levels in the tidepool sculpin

- Oligocottus maculosus*. *Physiol. Biochem. Zool.* **79**, 1033-1045. doi:10.1086/507664
- Tomanek, L. and Sanford, E.** (2003). Heat-shock protein 70 (Hsp70) as a biochemical stress indicator: an experimental field test in two congeneric intertidal gastropods (Genus: *Tegula*). *Biol. Bull.* **205**, 276-284. doi:10.2307/1543291
- Tomanek, L. and Somero, G. N.** (1999). Evolutionary and acclimation-induced variation in the heat-shock responses of congeneric marine snails (genus *Tegula*) from different thermal habitats: implications for limits of thermotolerance and biogeography. *J. Exp. Biol.* **202**, 2925-2936. doi:10.1242/jeb.202.21.2925
- Tomanek, L. and Somero, G. N.** (2000). Time course and magnitude of synthesis of heat-shock proteins in congeneric marine snails (genus *Tegula*) from different tidal heights. *Physiol. Biochem. Zool.* **73**, 249-256. doi:10.1086/316740
- Tortell, P. D., DiTullio, G. R., Sigman, D. M. and Morel, F. M. M.** (2002). CO<sub>2</sub> effects on taxonomic composition and nutrient utilization in an Equatorial Pacific phytoplankton assemblage. *Mar. Ecol. Prog. Ser.* **236**, 37-43. doi:10.3354/meps236037
- Vafeiadou, A.-M., Bretaña, B. L. P., Van Colen, C., dos Santos, G. A. P. and Moens, T.** (2018). Global warming-induced temperature effects to intertidal tropical and temperate meiobenthic communities. *Mar. Environ. Res.* **142**, 163-177. doi:10.1016/j.marenvres.2018.10.005
- Verheyen, J. and Stoks, R.** (2019). Temperature variation makes an ectotherm more sensitive to global warming unless thermal evolution occurs. *J. Anim. Ecol.* **88**, 624-636. doi:10.1111/1365-2656.12946
- Vermeij, G. J.** (1973). Morphological patterns in high-intertidal gastropods: adaptive strategies and their limitations. *Mar. Biol.* **20**, 319-346. doi:10.1007/BF00354275
- Wang, W. X. and Widdows, J.** (1993). Metabolic responses of the common mussel *Mytilus edulis* to hypoxia and anoxia. *Mar. Ecol. Prog. Ser.* **95**, 205-214. doi:10.3354/meps095205
- Wang, D., Gouhier, T. C., Menge, B. A. and Ganguly, A. R.** (2015). Intensification and spatial homogenization of coastal upwelling under climate change. *Nature* **518**, 390-394. doi:10.1038/nature14235
- Wang, J., Peng, X. and Dong, Y.** (2020). High abundance and reproductive output of an intertidal limpet (*Siphonaria japonica*) in environments with high thermal predictability. *Mar. Life Sci. Technol.* **2**, 324-333. doi:10.1007/s42995-020-00059-7
- Widdows, J.** (1976). Physiological adaptation of *Mytilus edulis* to cyclic temperatures. *J. Comp. Physiol.* **105**, 115-128. doi:10.1007/BF00691115
- Widdows, J.** (1978). Combined effects of body size, food concentration and season on the physiology of *Mytilus edulis*. *J. Mar. Biol. Assoc. UK* **58**, 109-124. doi:10.1017/S0025315400024449
- Widdows, J. and Bayne, B. L.** (1971). Temperature acclimation of *Mytilus edulis* with reference to its energy budget. *J. Mar. Biol. Assoc. UK* **51**, 827-843. doi:10.1017/S0025315400018002
- Widdows, J. and Shick, J. M.** (1985). Physiological responses of *Mytilus edulis* and *Cardium edule* to aerial exposure. *Mar. Biol.* **85**, 217-232. doi:10.1007/BF00393242
- Williams, C. M., Marshall, K. E., MacMillan, H. A., Dzurisin, J. D. K., Hellmann, J. J. and Sinclair, B. J.** (2012). Thermal variability increases the impact of autumnal warming and drives metabolic depression in an overwintering butterfly. *PLoS ONE* **7**, e34470. doi:10.1371/journal.pone.0034470
- Willis, J. R., Hickey, A. J. R. and Devaux, J. B. L.** (2021). Thermally tolerant intertidal triplefin fish (Tripterygiidae) sustain ATP dynamics better than subtidal species under acute heat stress. *Sci. Rep.* **11**, 11074. doi:10.1038/s41598-021-90575-y
- Wood, S. N.** (2004). Stable and efficient multiple smoothing parameter estimation for generalized additive models. *J. Am. Stat. Assoc.* **99**, 673-686. doi:10.1198/016214504000000980
- Yin, X., Chen, P., Chen, H., Jin, W. and Yan, X.** (2017). Physiological performance of the intertidal Manila clam (*Ruditapes philippinarum*) to long-term daily rhythms of air exposure. *Sci. Rep.* **7**, 1-12. doi:10.1038/s41598-016-0028-x
- Zhang, W. Y., Storey, K. B. and Dong, Y. W.** (2021). Synchronization of seasonal acclimatization and short-term heat hardening improves physiological resilience in a changing climate. *Funct. Ecol.* **35**, 686-695. doi:10.1111/1365-2435.13768
- Zuur, A. F., Ieno, E. N., Walker, N. J., Saveliev, A. A. and Smith, G. M.** (2009). *Mixed Effects Models and Extensions in Ecology with R*, Vol. 574. New York: Springer.
